# Supplementary material for: Enhancement of prime editing via xrRNA motif-joined pegRNA
Source: PubMed Central journal article supplement (PMC8986804; doi:10.1038/s41467-022-29507-x), 2022-04-06
Supplement: 41467_2022_29507_MOESM1_ESM.pdf [file 41467_2022_29507_MOESM1_ESM.pdf]

## **SUPPLEMENTARY INFORMATION**

**Supplementary Fig. 1:** Sequences of five xrRNAs used.

**Supplementary Fig. 2:** Coding sequences of pCMV-mRuby-linker-EGFP used in this study.

**Supplementary Fig. 3:** The xr-pegRNAs enhanced prime editing of an EGFP reporter.

**Supplementary Fig. 4:** The xr-pegRNAs increased prime editing efficiency of base transition and transversion in PE2.

**Supplementary Fig. 5:** The xr-pegRNAs increased prime editing efficiency of base transition and transversion in PE3.

**Supplementary Fig. 6:** Relative edit:indel ratio by xrRNA motif-joined pegRNAs examined in Fig. 2.

**Supplementary Fig. 7:** The xrPE increased prime editing efficiency of base transition and transversion at a larger panel of sites in HEK293T cells.

**Supplementary Fig. 8:** The xrPE-dependent base conversions and the associated relative edit:indel ratios.

**Supplementary Fig. 9:** Effects of RT template length on the efficiency of xrPE and canonical PE3 in HEK293T cells.

**Supplementary Fig. 10:** The xrPE increased prime editing efficiency for base transition and transversion in HeLa cells in comparison to PE3, while featuring largely undiminished edit:indel ratios.

**Supplementary Fig. 11:** The xrPE increased prime editing efficiency of base transition and transversion in N2a cells.

**Supplementary Fig. 12:** Relative edit:indel ratios associated with xrPE-mediated small insertions and deletions shown in Fig. 4.

**Supplementary Fig. 13:** The xrPE increased prime editing efficiency of precise deletion and insertion in HeLa cells in comparison to PE3, while featuring largely undiminished edit:indel ratios.

**Supplementary Fig. 14:** Overall comparisons of undesired indel rates induced by canonical PE3 and xrPE in HEK293T cells.

**Supplementary Fig. 15:** Minimal levels of potential base conversion byproduct induced by canonical PE3 and xrPE at 15 edited sites in HEK293T cells.

**Supplementary Fig. 16:** Comparison of potential off-target rates for canonical PE3 and xrPE in 3 prime editing applications in HEK293T cells.

**Supplementary Fig. 17:** Lentiviral vector-introduced xr-pegRNA increased prime editing efficiencies by PE2 in HEK293T cells.

**Supplementary Fig. 18:** Lentiviral vector-introduced xr-pegRNA increased prime editing efficiencies by PE3 in HEK293T cells.

**Supplementary Fig. 19:** The xrRNA motif increased pegRNA stability to preferentially impact its prime editing function.

**Supplementary Fig. 20:** Comparable editing efficiency by PE3 driven by xr-pegRNAs (with or without linkers) and epegRNAs in HEK293T cells.

**Supplementary Fig. 21:** Relative edit:indel ratios associated with prime editing experiments by xr-pegRNAs (with or without linkers) and epegRNAs shown in Fig. 5d and Supplementary Fig. 20.

**Supplementary Table 1:** Sequences for primers used for constructing WT pegRNA plasmids.

**Supplementary Table 2:** Primers used for human cells genomic DNA amplification and targeted deep sequencing.

**Supplementary Table 3:** Primers used for N2a cells genomic DNA amplification and targeted deep sequencing.

**Supplementary Table 4:** Information of predicted off-target sites related to Supplementary Fig. 16.

**Supplementary Table 5:** Primers used for off-target analysis related to Supplementary Fig. 16.

**Supplementary Table 6:** Primers used for pegRNA RT-qPCR analysis.

**Supplementary Data 1:** Sequences for pegRNAs and xr-pegRNAs. – This dataset is provided in a separate “xls” file.

### **MVE**

TAGTCAGGCCAGCCGGTTAGGCTGCCACCGAAGGTTGGTAGACGGTGCTGCCTGCGAC  
CAACCCAGGAGGACTGGGT

### **WNV**

AGTCAGGCCAGATTAATGCTGCCACCGGAAGTTGAGTAGACGGTGCTGCCTGCGGCTC  
AACCCAGGAGGACTGGGT

### **Zika**

TGTCAGGCCTGCTAGTCAGCCACAGTTTGGGAAAGCTGTGCAGCCTGTAACCCCCCA  
GGAGAAGCTGGGAAACCAAGCT

### **Dengue**

AGTCAGGCCACTTGTGCCACGGTTTGAGCAAACCGTGCTGCCTGTAGCTCCGCCAATAA  
TGGGAGGCGT

### **YF**

TGTCAGCCCAGAACCCACACGAGTTTTGCCACTGCTAAGCTGTGAGGCAGTGCAGGCT  
GGGACAGCCGACCTCCAGGTTGCGAAAAACCTGGT

**Supplementary Fig. 1: Sequences of five xrRNAs used.**

## Coding sequence of EGFP fluorescent report system

ATGAACAGCCTGATCAAAGAAAACATGCGGATGAAGGTGGTGTCTGGAAGGCAGCGTGAA  
CGGCCACCAGTTCAAGTGCACCGGCGAGGGCGAGGGCAACCCCTACATGGGCACCCAGA  
CCATGCGGATCAAAGTGATCGAGGGCGGACCTCTGCCCTTCGCCTTCGACATCCTGGCCAC  
ATCCTTCATGTACGGCAGCCGGACCTTCATCAAGTACCCCAAGGGCATCCCCGATTTCTTC  
AAGCAGAGCTTCCCCGAGGGCTTCACCTGGGAGAGAGTGACCAGATACGAGGACGGCGG  
CGTGATCACCGTGATGCAGGACACCAGCCTGGAAGATGGCTGCCTGGTGTACCATGCCCA  
GGTCAGGGGCGTGAATTTCCAGCAACGGCGCCGTGATGCAGAAGAAAACCAAGGGCT  
GGGAGCCCAACACCGAGATGATGTACCCCGCTGACGGCGGACTGAGAGGCTACACCCAC  
ATGGCCCTGAAGGTGGACGGCGGAGGGCACCTGAGCTGCAGCTTCGTGACCACCTACCGA  
TCCAAGAAAACCGTGGGCAACATCAAGATGCCCGGCATCCACGCCGTGGACCACCGGCTG  
GAAAGGCTGGAAGAGTCCGACAACGAGATGTTCTGGTGCAGCGGGAGCACGCCGTGGC  
CAAGTTCGCCGGCCTGGGCGGAGGGAAAGGATCCGCAGGGCGGAGGAGGCAGCGGGCGGAG  
GAGGCAGCGGCGGAGGAGGCAGCGCCTGCTCGCGATGCTAGAGGGCTCTGCCAGGGGGG  
GTCGCCACCATGGTGAGCAAGGGCGAGGAGCTGTTACCCGGGGTGGTGCCCATCCTGGTC  
GAGCTGGACGGCGACGTAACGGCCACAAGTTCAGCGTGTCCGGCGAGGGCGAGGGCGA  
TGCCACCTACGGCAAGCTGACCCTGAAGTTCATCTGCACCACCGGCAAGCTGCCCGTGCC  
CTGGCCCACCCTCGTGACCACCCTGACCTACGGCGTGCAGTGCTTCAGCCGCTACCCCGAC  
CACATGAAGCAGCACGACTTCTTCAAGTCCGCCATGCCCGAAGGCTACGTCCAGGAGCGC  
ACCATCTTCTTCAAGGACGACGGCAACTACAAGACCCGCGCCGAGGTGAAGTTCGAGGGC  
GACACCCTGGTGAACCGCATCGAGCTGAAGGGCATCGACTTCAAGGAGGACGGCAACATC  
CTGGGGCACAAGCTGGAGTACAACACTACAACAGCCACAACGTCTATATCATGGCCGACAAG  
CAGAAGAACGGCATCAAGGTGAACTTCAAGATCCGCCACAACATCGAGGACGGCAGCGT  
GCAGCTCGCCGACCACTACCAGCAGAACACCCCATCGGCGACGGCCCCGTGCTGCTGCC  
CGACAACCACTACCTGAGCACCCAGTCCGCCCTGAGCAAAGACCCCAACGAGAAGCGCG  
ATCATGCTCCTGCTGGAGTTCGTGACCGCCGCCGGGATCACTCTCGGCATGGACGAGC  
TGTACAAGTAA

**Supplementary Fig. 2: Coding sequences of pCMV-mRuby-linker-EGFP used in this study.** The coding sequences of mRuby, linker and EGFP are colored in red, grey and green, respectively. The stop codon is background-highlighted in red.



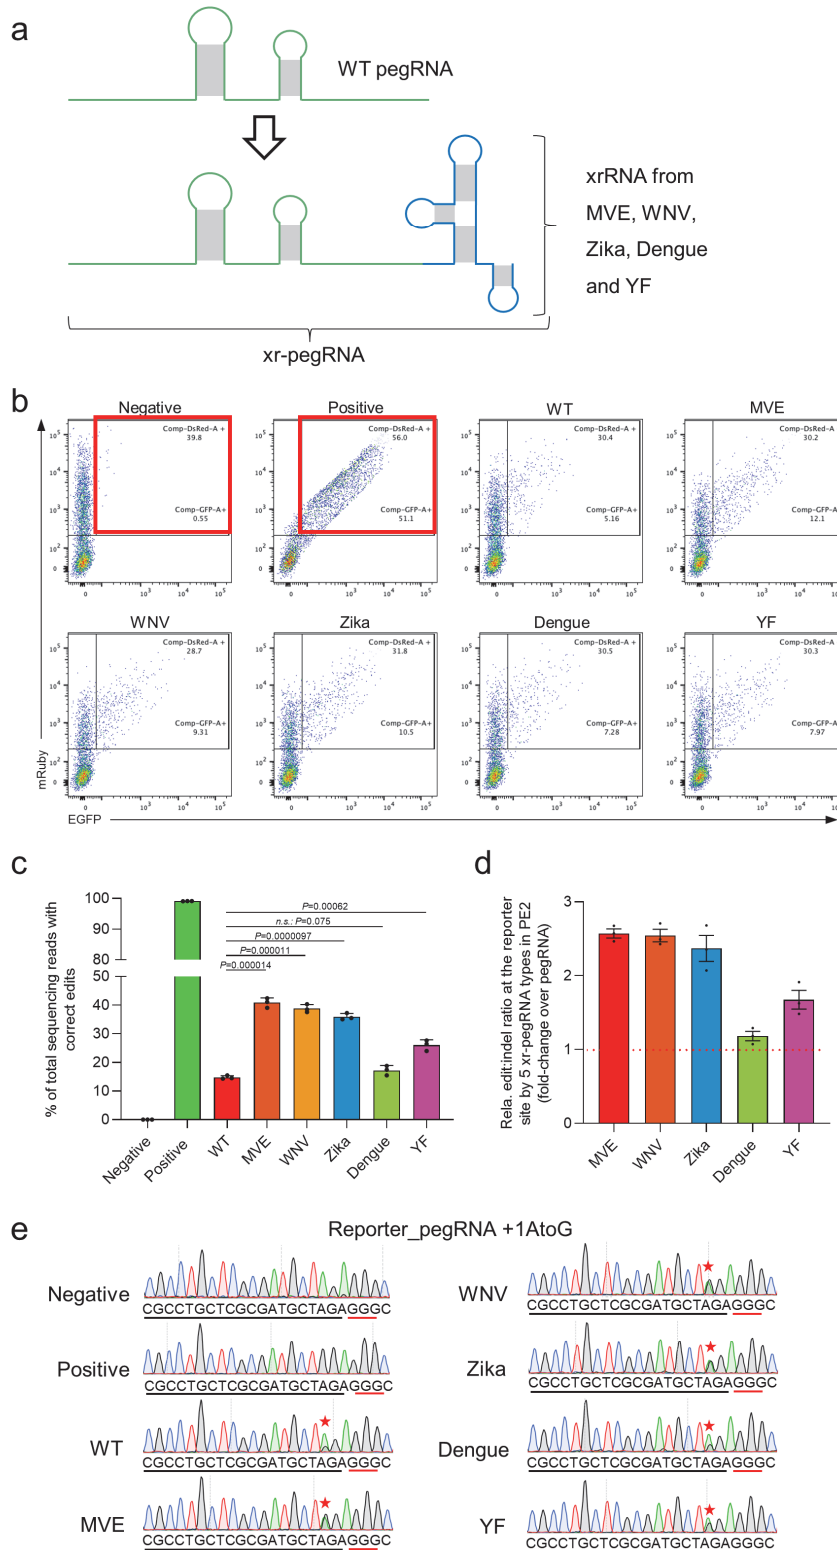

**Supplementary Fig. 3: The xr-pegRNAs enhanced prime editing of an EGFP reporter.**

- a.** Schematic representation of WT pegRNA and xr-pegRNA. Five xrRNA motifs (derived from five different viruses: Murray Valley encephalitis (MVE), West Nile virus (WNV), Zika, Dengue (Dengue4), and Yellow Fever (YF)) were joined to the 3' end of pegRNA.

- b.** Flow cytometry analyses of cell transfected with the PE2 (xr-pegRNAs) and the editing reporter are presented. The red boxes in the first two plots indicate gating for edited cells. The control pegRNA-transfectants and the mRuby-EGFP without the stop codon were used as negative and positive controls, respectively. The ratios of EGFP expression shown in **Fig. 1d** were calculated as:  $\text{comp-GFP-A}^+/\text{comp-DsRed-A}^+$ .
- c.** The xr-pegRNAs increased targeted efficiency of A-to-G edit using PE2 strategy. PCR amplicons from the target regions were analyzed by targeted deep sequencing. The reads harboring only the correct edit were counted to evaluate the editing efficiency. Data are presented as mean values  $\pm$  SD,  $n = 3$  biological replicates. Two-tailed student's t-tests were performed. *P* values are marked on the graph (*n.s.*: not significant)
- d.** Relative edit:indel ratios associated with the above PE2-mediated reporter editing using different constructs of xr-pegRNAs are shown (mean  $\pm$  SEM,  $n=3$  biological replicates). The levels of the WT pegRNA group was set to 1 (the red dashed line).
- e.** Sanger sequencing chromatograms of the A-to-G edit induced by PE2 with WT pegRNA and xr-pegRNAs. Asterisks indicate the desired editing. The PAM sequence and spacer sequence of pegRNA are underlined in red and black, respectively.

Source data are provided as a Source Data file.

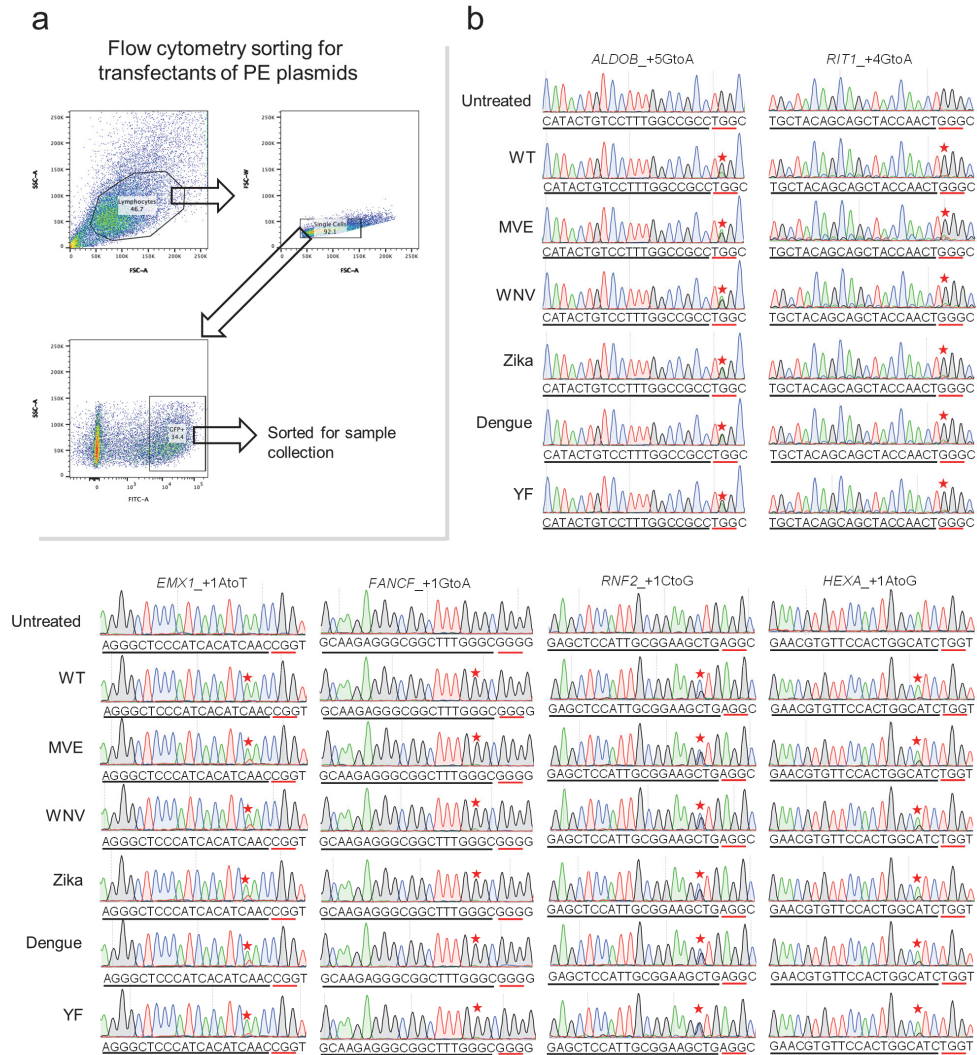

**Supplementary Fig. 4: The xr-pegRNAs increased prime editing efficiency of base transition and transversion in PE2.**

- Gating strategy for flow cytometry sorting of cells transfected with PE plasmids is shown.
- Sanger sequencing chromatograms of the six sites in **Fig. 2a**. Asterisks indicate the desired editing. The PAM sequence and spacer sequence of pegRNA are underlined in red and black, respectively.

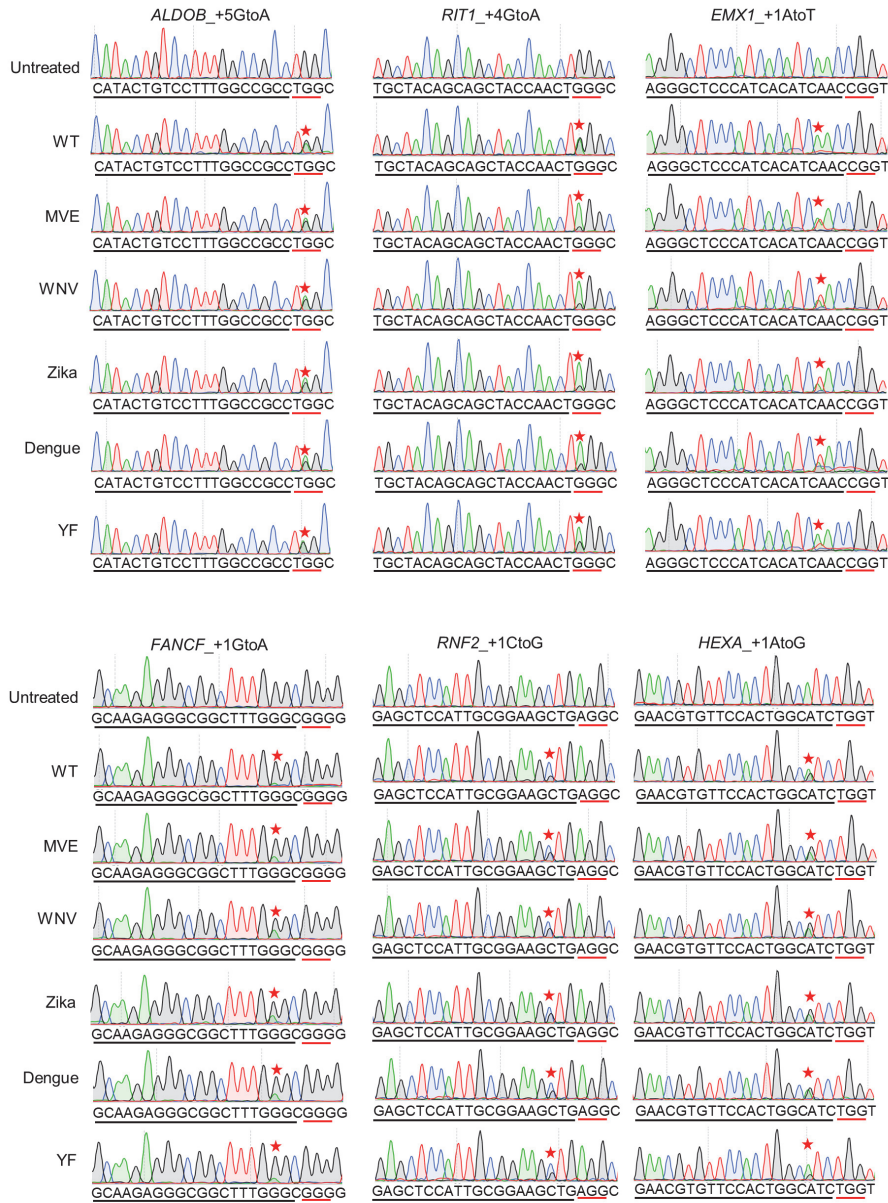

**Supplementary Fig. 5: The xr-pegRNAs increased prime editing efficiency of base transition and transversion in PE3.** Sanger sequencing chromatograms of the six sites in Fig. 2c. Asterisks indicate the desired editing. The PAM sequence and spacer sequence of pegRNA are underlined in red and black, respectively.

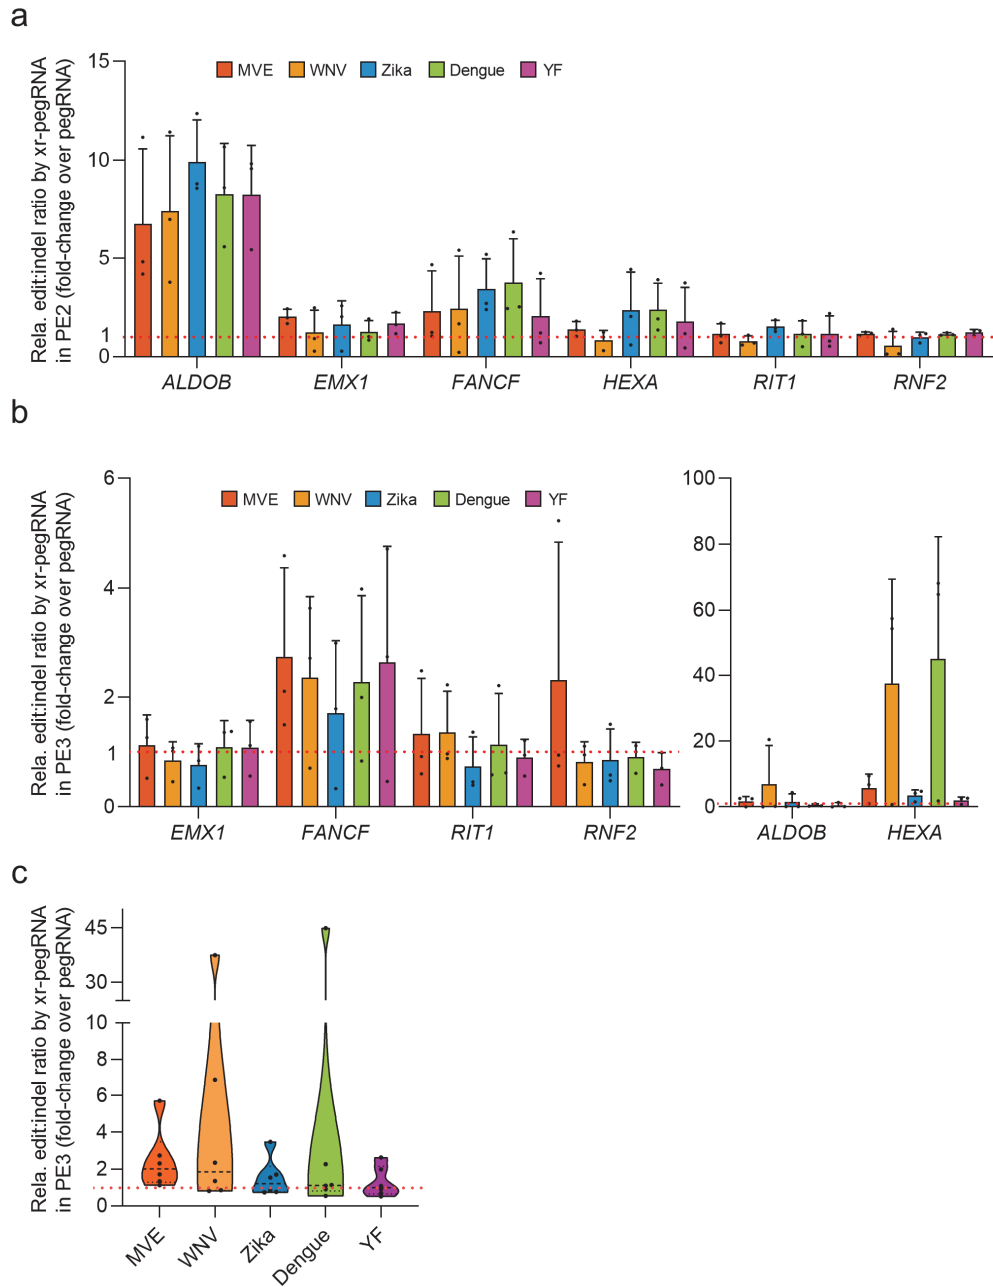

**Supplementary Fig. 6: Relative edit:indel ratio by xrRNA motif-joined pegRNAs examined in**

**Fig. 2.**

- a.** Relative edit:indel ratios associated with PE2-mediated editing of 6 sites (in HEK293T cells) using different constructs of xr-pegRNAs are presented. The raw data are presented in the Source Data file. The levels of the WT pegRNA group was set as 1 (the red dashed line). The results correspond to those shown in **Fig. 2a** (mean  $\pm$  SEM, n = 3 biological replicates).

- b.** Relative edit:indel ratios associated with PE3-mediated editing of 6 sites (in HEK293T cells) using different constructs of xr-pegRNAs are presented. The raw data are presented in the Source Data file. The levels of the WT pegRNA group were set as 1 (the red dashed line). The results correspond to those shown in **Fig. 2c** (mean  $\pm$  SEM, n = 3 biological replicates). The indel rates presented in the raw data also confirm that PE3 is associated with higher indel rates than PE2. For instance, the median indel rates by the WT pegRNAs at the *EMXI* and *HEXA* sites increase from 0.02% and 0.02% (by PE2) to 1.64% and 0.42% (by PE3), respectively.
- c.** When all target sites (n=6) analyzed above were considered as a whole, the relative edit:indel ratios associated with PE3 using different constructs of xr-pegRNAs are presented. The levels of the WT pegRNA group was set as 1 (the red dashed line). In the violin plot, each point represents the averaged editing activity at the particular site. The thicker dotted line shows the medians of all data points, while the thinner dotted lines correspond to quartiles (1st and 3rd). Source data are provided as a Source Data file.



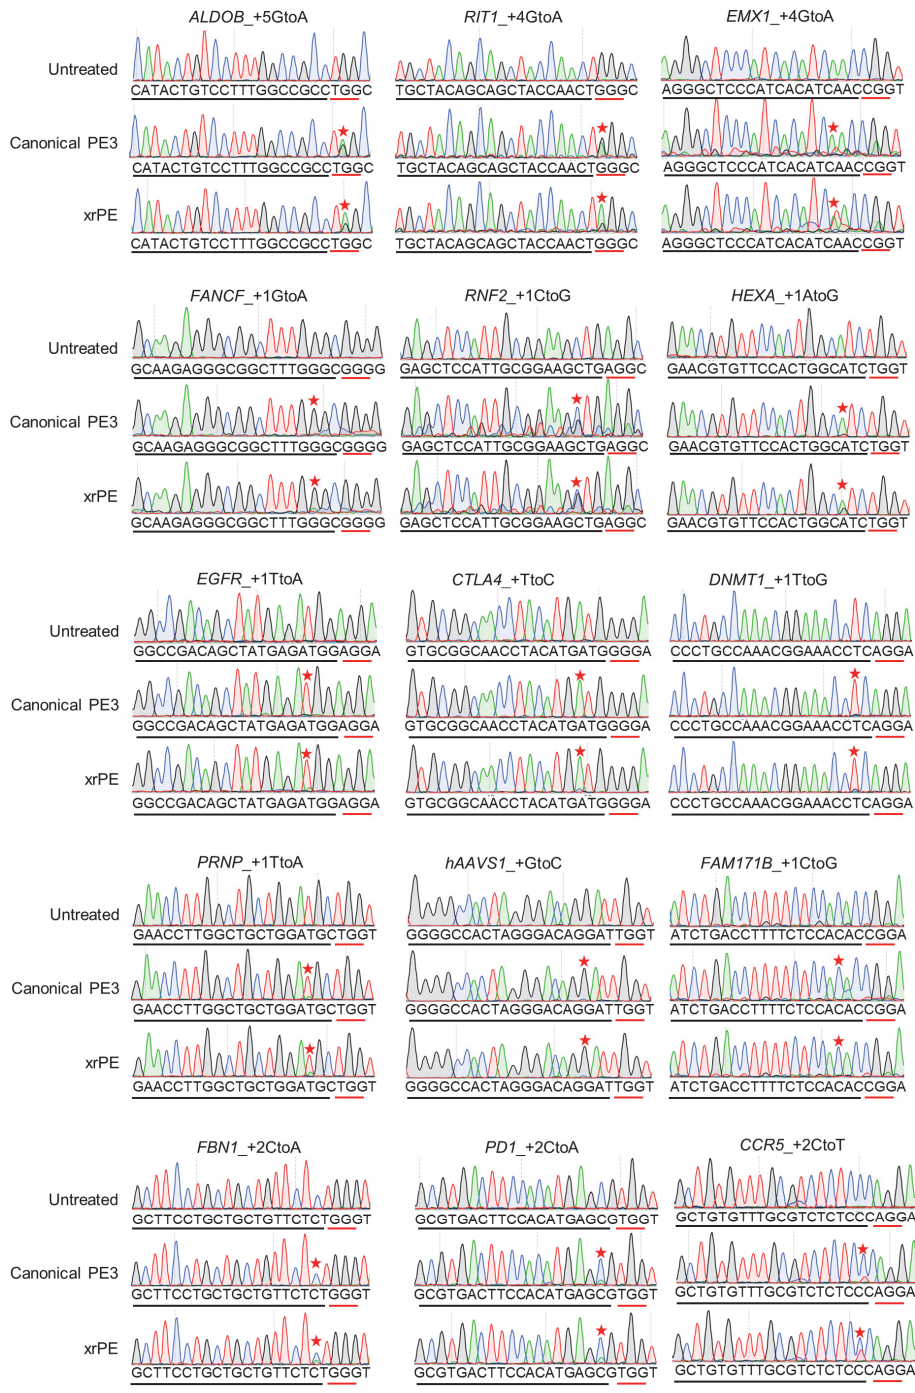

**Supplementary Fig. 7: The xrPE increased prime editing efficiency of base transition and transversion at a larger panel of sites in HEK293T cells. Sanger sequencing chromatograms of the 15 sites in Fig. 3b and Supplementary Fig. 8a are shown. Asterisks indicate the desired editing. The PAM sequence and spacer sequence of pegRNA are underlined in red and black, respectively.**

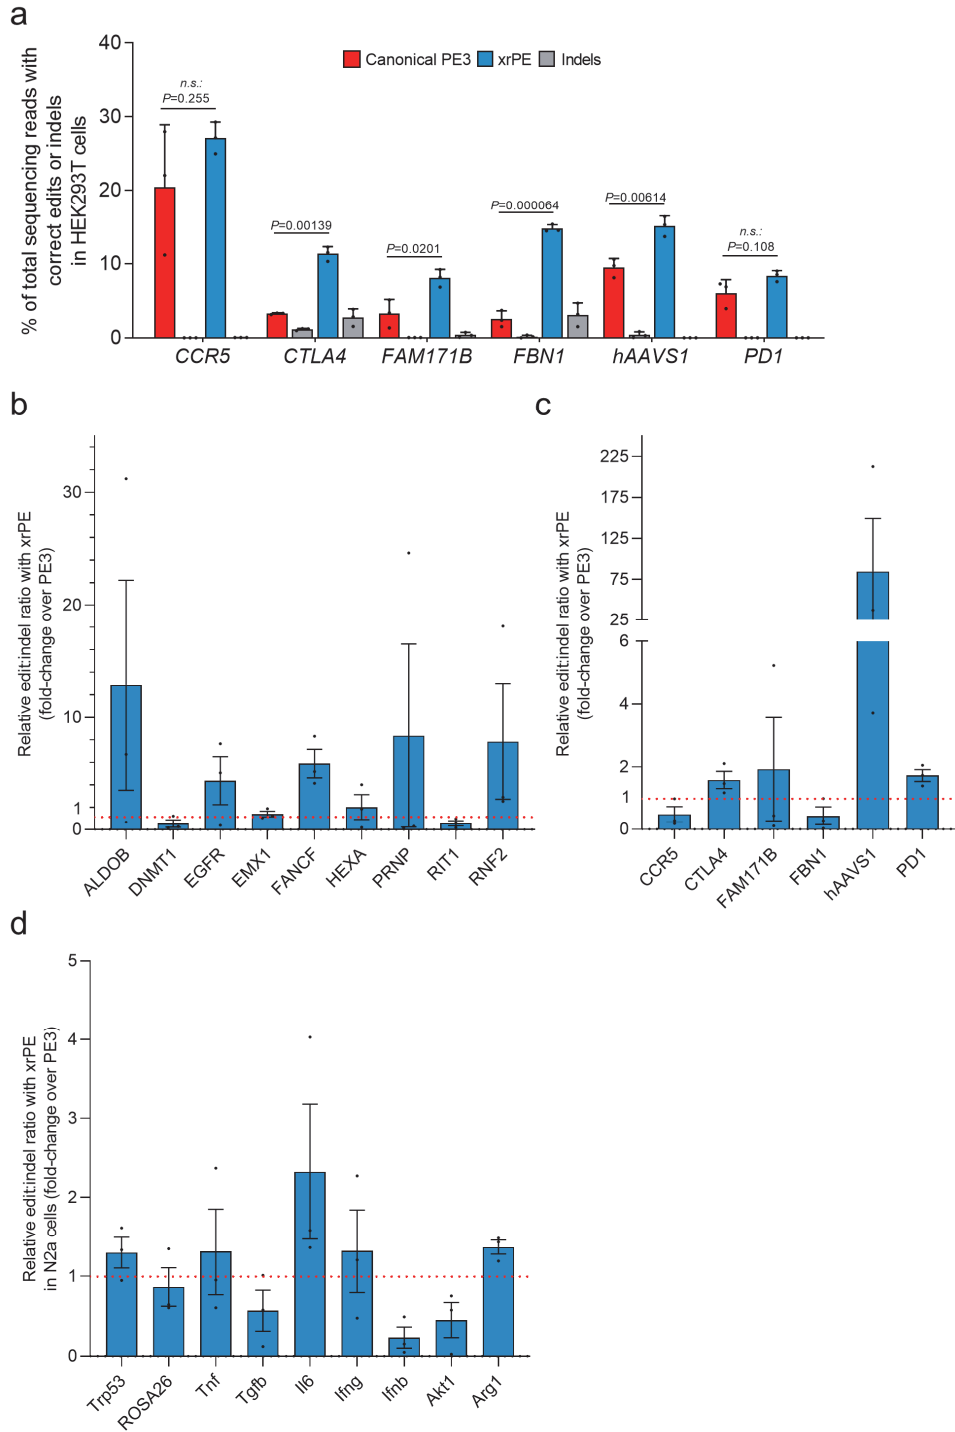

**Supplementary Fig. 8: The xrPE-dependent base conversions and the associated relative edit:indel ratios.**

**a.** Comparison of efficiencies of base transition and transversion at 6 additional sites, as indicated, by xrPE and PE3 in HEK293T cells. The editing efficiencies were shown by red/blue-colored bars (mean  $\pm$  SD, n=3 biological replicates). The grey bars immediately next to the red/blue-colored



bars indicate the indel frequencies associated with each editing group. Two-tailed student's t-tests were performed (with *P* values marked on the graph, *n.s.*: not significant).

- b.** Relative edit:indel ratios associated with xrPE-mediated editing of 9 indicated sites (in HEK293T cells) are presented (mean  $\pm$  SEM, *n* = 3 biological replicates). The levels of the PE3 group were set as 1 (the red dashed line). The results correspond to those shown in **Fig. 3b**.
- c.** Relative edit:indel ratios associated with xrPE-mediated editing of 6 additional sites (in HEK293T cells) are presented (mean  $\pm$  SEM, *n* = 3 biological replicates). The levels of the PE3 group were set as 1 (the red dashed line). The results correspond to those shown in panel **(a)** of this figure.
- d.** Relative edit:indel ratios associated with xrPE-mediated editing of 9 indicated sites (in N2a cells) are presented (mean  $\pm$  SEM, *n* = 3 biological replicates). The levels of the PE3 group were set as 1 (the red dashed line). The results correspond to those shown in **Fig. 3d**.

Source data are provided as a Source Data file.

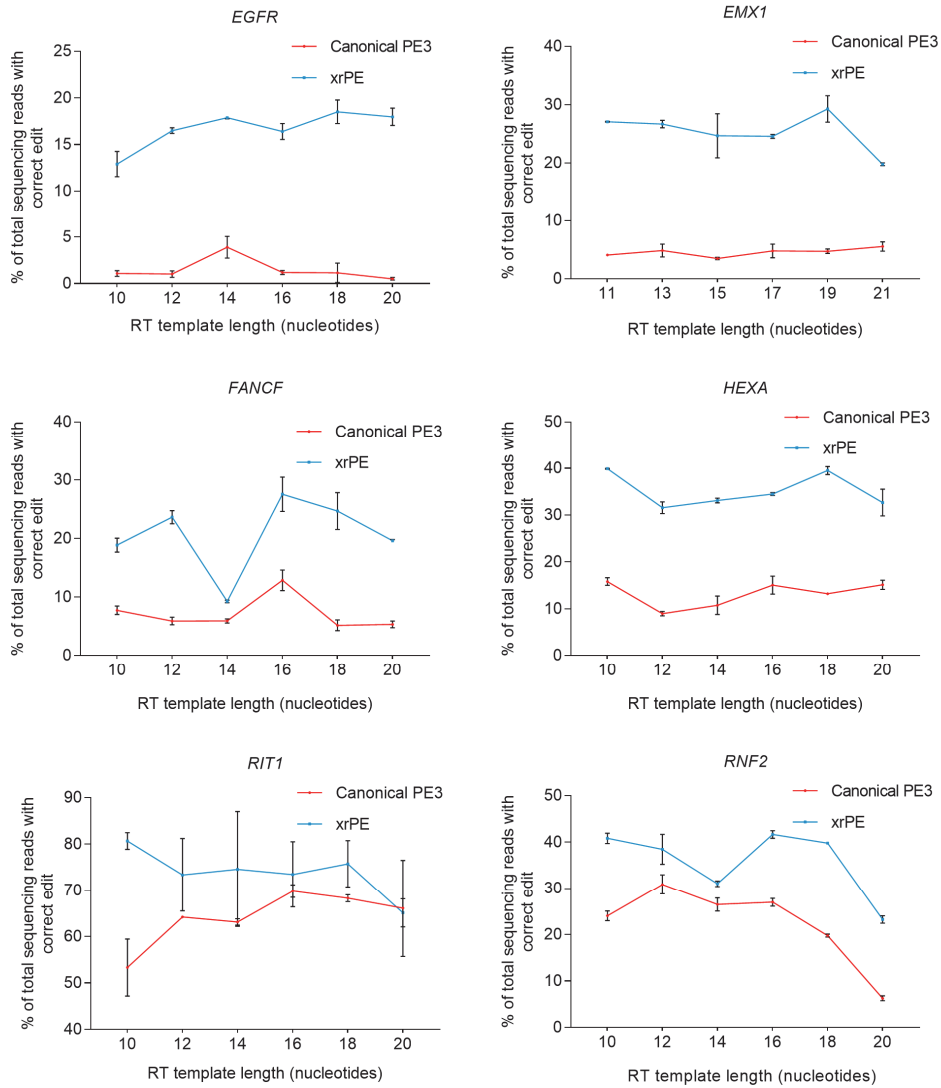

**Supplementary Fig. 9: Effects of RT template length on the efficiency of xrPE and canonical PE3 in HEK293T cells.** Targeted editing efficiency of base transition and transversion by canonical PE3 and xrPE using pegRNAs with different RT template lengths at 6 indicated sites in HEK293T. Analyses were carried out with editing rates from 3 biological replicates (mean  $\pm$  SD). Source data are provided as a Source Data file.

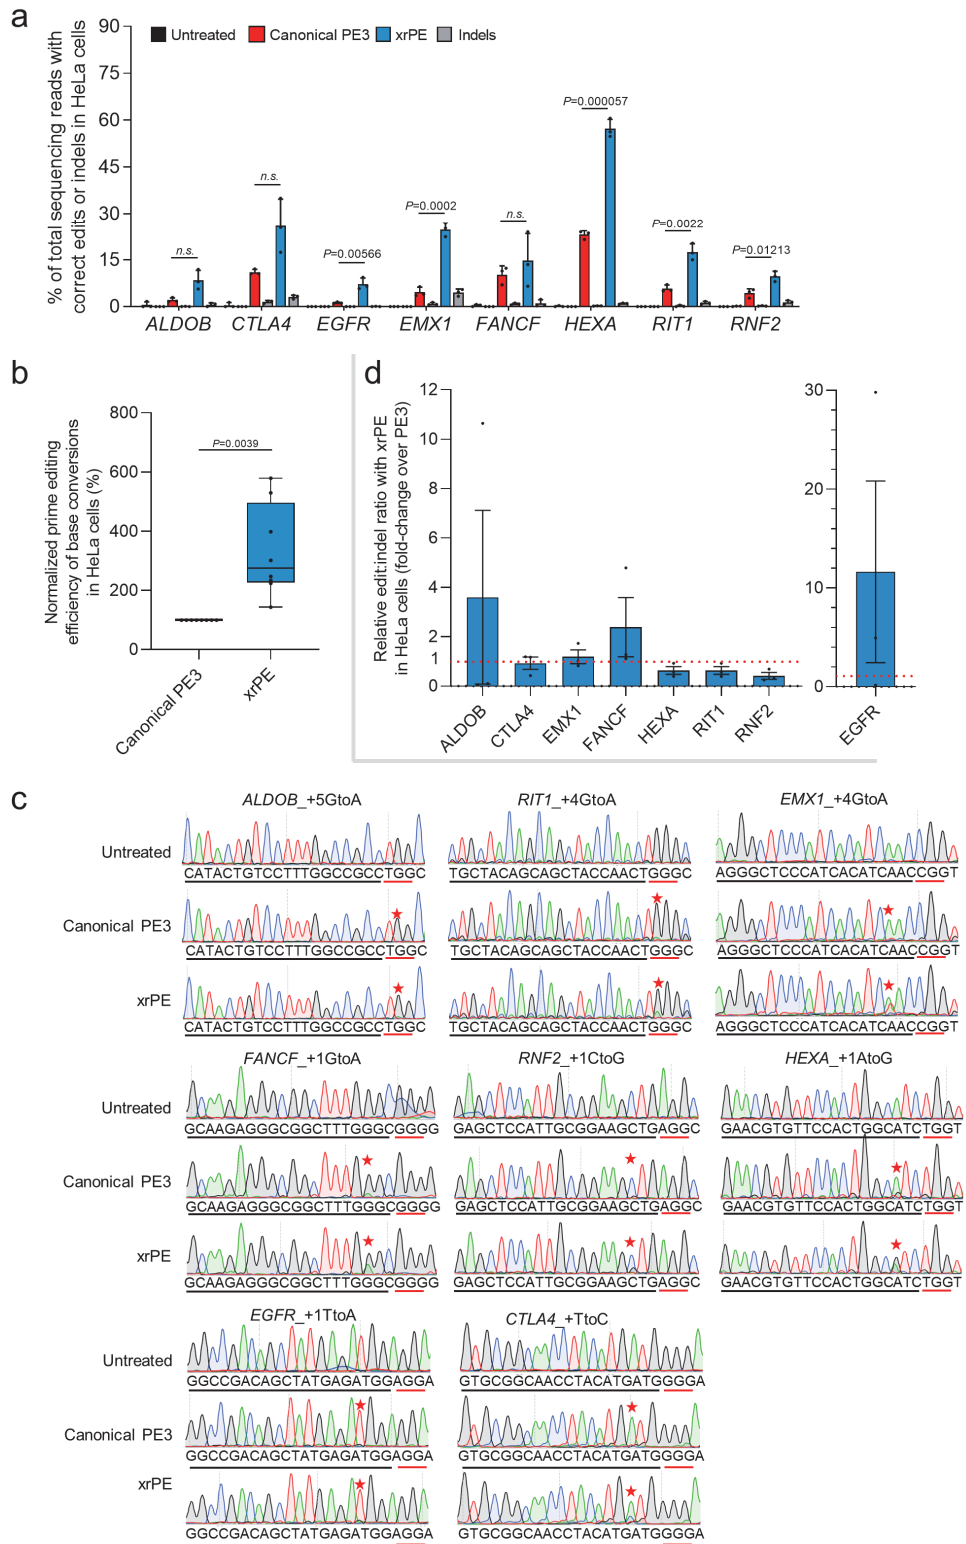

**Supplementary Fig. 10: The xrPE increased prime editing efficiency for base transition and transversion in HeLa cells in comparison to PE3, while featuring largely undiminished edit:indel ratios.**

- a.** Comparison of efficiencies of base transition and transversion at 8 sites by xrPE and PE3 in HeLa cells. The editing efficiencies were shown by red/blue-colored bars (mean  $\pm$  SD, n=3 biological replicates). The grey bars immediately next to the red/blue-colored bars indicate the indel frequencies associated with each editing group. Multiple t tests (two-tailed) were performed. Statistical significance was determined using the Holm-Sidak method in GraphPad, with alpha = 0.05. When discoveries are made (5/8), the exact *P* values (unadjusted) are marked on graph. Otherwise, the comparisons are marked by “*n.s.*” (not significant), where the corresponding *P* values are 0.027 (*ALDOB*), 0.043 (*CTLA4*) and 0.451 (*FANCF*), respectively. The stringencies of such test design can be noted in some comparisons where the unadjusted *P* values are smaller than 0.05.
- b.** The results in **(a)** are further analyzed by considering editing at all sites (n=8) as a whole. The editing frequencies induced by canonical PE3 were set as 100%. Each data point represents the averaged editing activity at the particular site. The center line shows medians of all data points and the box limits correspond to the upper the lower quartiles, while the whiskers extend to the largest and smallest values. Two-tailed one-sample student’s t-test was performed (with *P* value marked).
- c.** Sanger sequencing chromatograms of the 8 sites in HeLa cells. Asterisks indicate the desired editing. The PAM sequence and spacer sequence of pegRNA are underlined in red and black, respectively.
- d.** Relative edit:indel ratios associated with xrPE-mediated editing of 8 indicated sites (in HeLa cells) are presented (mean  $\pm$  SEM, n = 3 biological replicates). The levels of the PE3 group were set as 1 (the red dashed line). The results correspond to those shown in panel **(a)** of this figure.

Source data are provided as a Source Data file.

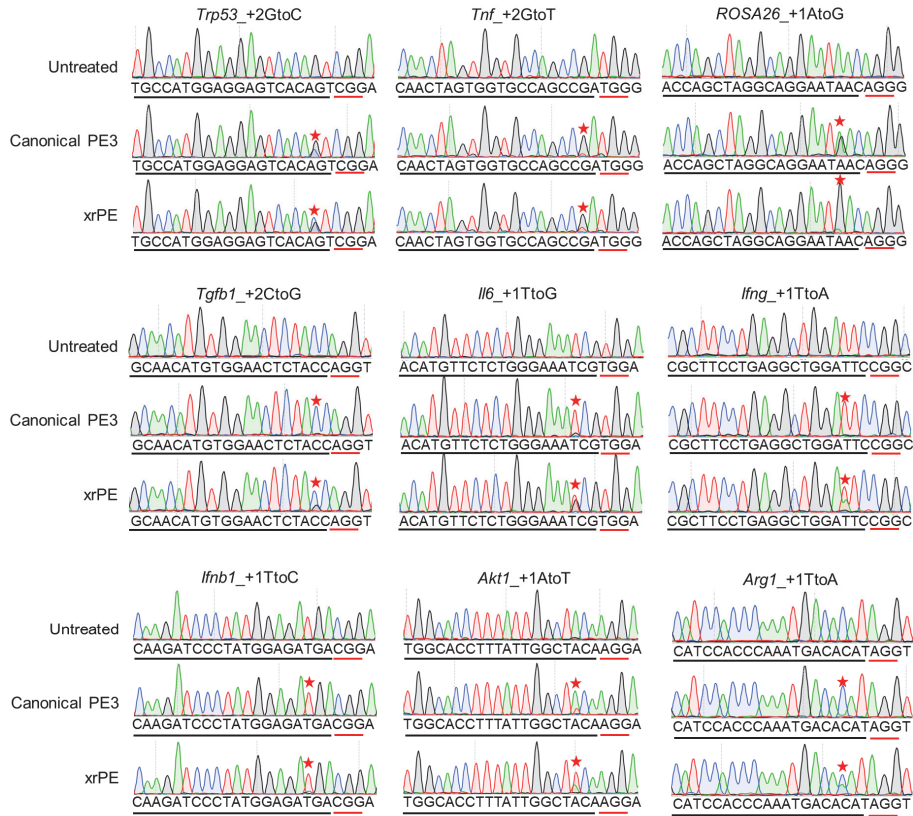

**Supplementary Fig. 11: The xrPE increased prime editing efficiency of base transition and transversion in N2a cells.** Sanger sequencing chromatograms of the 9 targeted sites in N2a cells (Fig. 3d). Asterisks indicate the desired editing. The PAM sequence and spacer sequence of pegRNA are underlined in red and black, respectively.

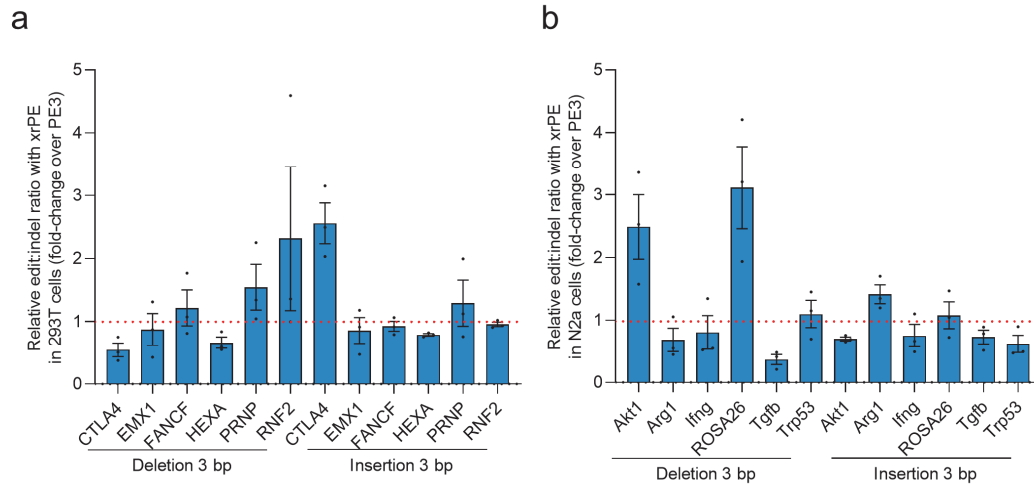

**Supplementary Fig. 12: Relative edit:indel ratios associated with xrPE-mediated small insertions and deletions shown in Fig. 4.**

- a.** Relative edit:indel ratios associated with xrPE-mediated small deletions and insertions at 6 sites (in HEK293T cells) are presented (mean  $\pm$  SEM, n = 3 biological replicates). The levels of the PE3 group were set as 1 (the red dashed line). The results correspond to those shown in **Fig. 4a**.
- b.** Relative edit:indel ratios associated with xrPE-mediated small deletions and insertions at 6 sites (in N2a cells) are presented (mean  $\pm$  SEM, n = 3 biological replicates). The levels of the PE3 group were set as 1 (the red dashed line). The results correspond to those shown in **Fig. 4c**.

Source data are provided as a Source Data file.

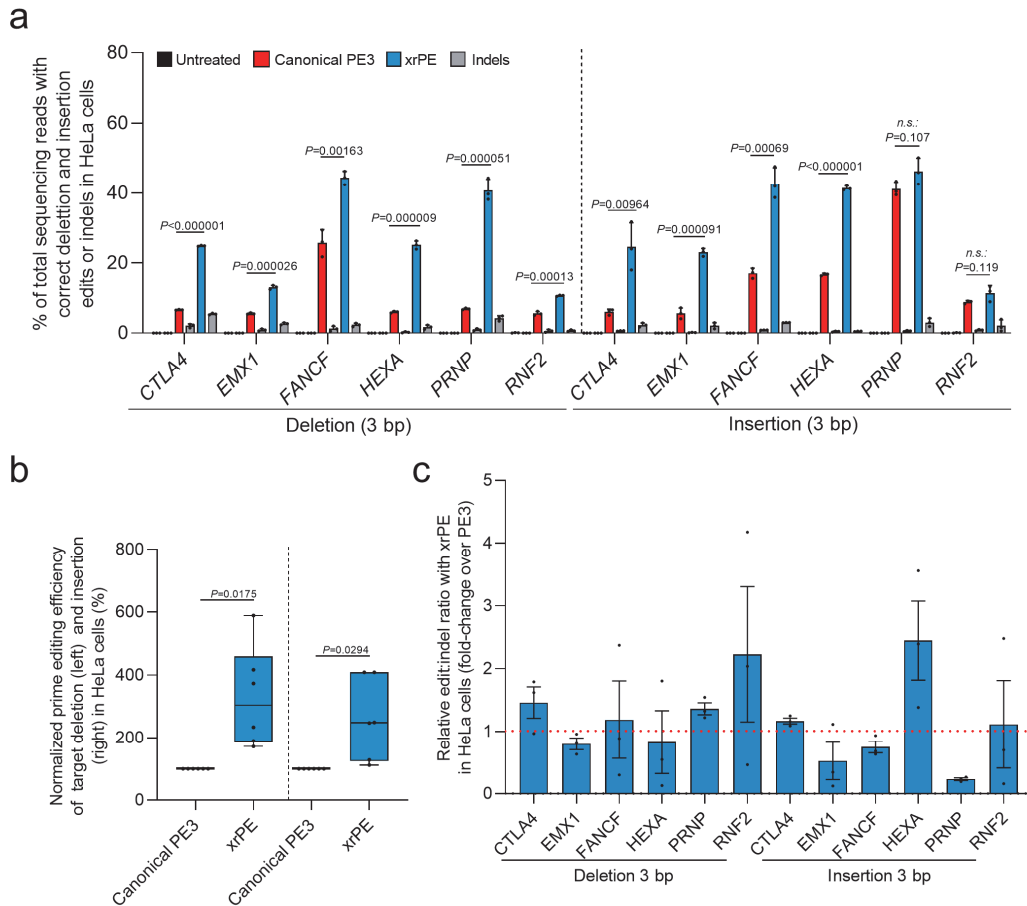

**Supplementary Fig. 13: The xrPE increased prime editing efficiency of precise deletion and insertion in HeLa cells in comparison to PE3, while featuring largely undiminished edit:indel ratios.**

- a.** Comparison of efficiencies of small deletions and insertions at 6 sites by xrPE and PE3 in HeLa cells. The editing efficiencies were shown by red/blue-colored bars (mean  $\pm$  SD,  $n=3$  biological replicates). The grey bars immediately next to the red/blue-colored bars indicate the indel frequencies associated with each editing group. The same set of indel data from untreated cells (background) were presented for deletions and insertions. Multiple t tests (two-tailed) were performed. Discoveries were determined using the two-stage linear step-up procedure of Benjamini, Krieger and Yekutieli, with  $Q = 1\%$ . When discoveries are made (10/12), only the exact  $P$  values (unadjusted) are shown on the graphs. Otherwise, the comparisons are marked by “*n.s.*” (not significant) along with the  $P$  values.
- b.** The results in (a) are further analyzed by considering editing at all sites ( $n=6$  for deletions and insertions, respectively) as a whole. The editing frequencies induced by canonical PE3 were set as

100%. In the box plot, each data point represents the averaged editing activity at the particular site. The center line shows medians of all (n=6) data points and the box limits correspond to the upper the lower quartiles, while the whiskers extend to the largest and smallest values. Two-tailed one-sample student's t-test was performed (with *P* values marked).

- c. Relative edit:indel ratios associated with xrPE-mediated small deletions and insertions (corresponding to data in [a]) are presented (mean  $\pm$  SEM, n = 3 biological replicates). The levels of the PE3 group were set as 1 (the red dashed line).

Source data are provided as a Source Data file.



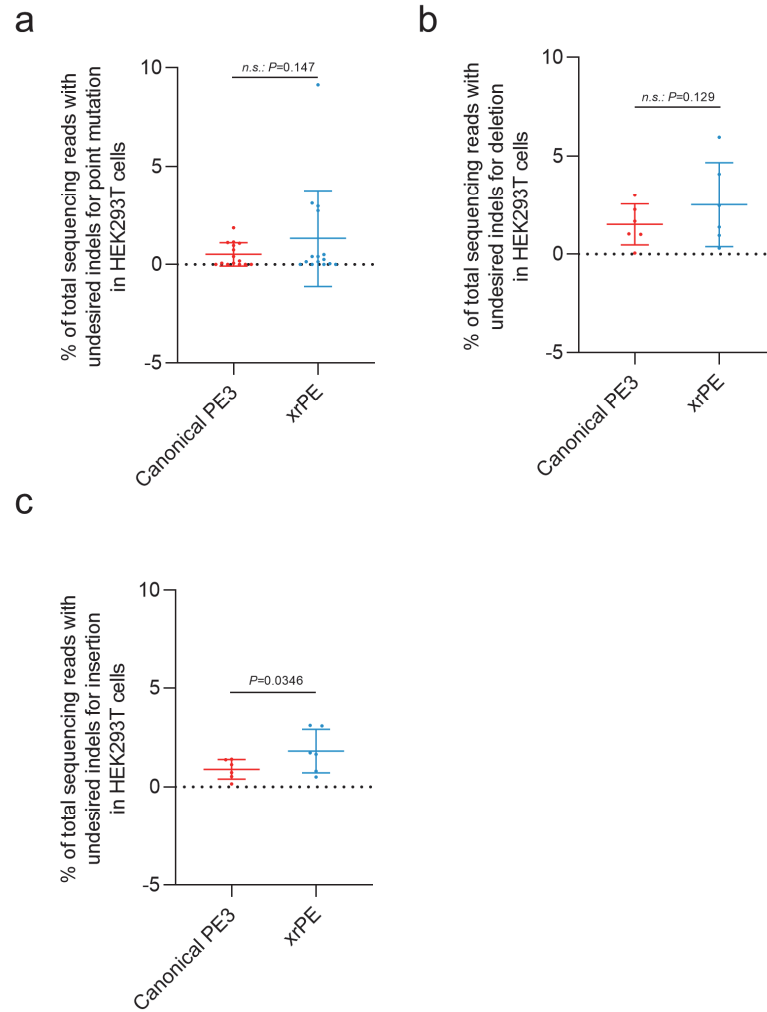

**Supplementary Fig. 14: Overall comparisons of undesired indel rates induced by canonical PE3 and xrPE in HEK293T cells.**

- a. Overall levels of undesired indels associated with PE3- and xrPE-dependent base conversions (n=15 independent sites) in HEK293T cells (as shown in **Fig. 3b** and **Supplementary Fig. 8a**).
- b. Overall levels of undesired indels associated with PE3- and xrPE-dependent small deletions (n=6 independent sites) in HEK293T cells (as shown in **Fig. 4a**).
- c. Overall levels of undesired indels associated with PE3- and xrPE-dependent small insertions (n=6 independent sites) in HEK293T cells (as shown in **Fig. 4a**). In (a-c), data are presented as mean values  $\pm$  SD. Two-tailed, paired student's t-tests were performed. *P* values are marked on the graphs (*n.s.*: not significant).

Source data are provided as a Source Data file.

| Untreated       |       |       |      |      |       |       |      |       |       |       |
|-----------------|-------|-------|------|------|-------|-------|------|-------|-------|-------|
| ALDOB +5GtoA(%) |       |       |      |      |       |       |      |       |       |       |
|                 | T     | G     | G    | C    | C     | G     | C    | C     | T     | G     |
| A               | 0.0   | 0.0   | 0.0  | 0.0  | 0.0   | 0.0   | 0.0  | 0.0   | 0.0   | 0.0   |
| C               | 0.0   | 0.0   | 0.0  | 99.6 | 100.0 | 0.0   | 99.9 | 100.0 | 0.0   | 0.0   |
| G               | 0.0   | 100.0 | 99.9 | 0.0  | 0.0   | 100.0 | 0.0  | 0.0   | 0.0   | 100.0 |
| T               | 100.0 | 0.0   | 0.0  | 0.4  | 0.0   | 0.0   | 0.0  | 0.0   | 100.0 | 0.0   |
| deletion        | 0.0   | 0.0   | 0.0  | 0.0  | 0.0   | 0.0   | 0.0  | 0.0   | 0.0   | 0.0   |

  

| Untreated      |       |       |       |       |      |       |       |       |       |       |
|----------------|-------|-------|-------|-------|------|-------|-------|-------|-------|-------|
| CCR5 +2CtoT(%) |       |       |       |       |      |       |       |       |       |       |
|                | T     | C     | T     | C     | T    | C     | C     | C     | A     | G     |
| A              | 0.0   | 0.0   | 0.0   | 0.0   | 0.0  | 0.0   | 0.0   | 0.0   | 100.0 | 0.0   |
| C              | 0.0   | 100.0 | 0.0   | 100.0 | 0.1  | 100.0 | 100.0 | 100.0 | 0.0   | 0.0   |
| G              | 0.0   | 0.0   | 0.0   | 0.0   | 0.0  | 0.0   | 0.0   | 0.0   | 0.0   | 100.0 |
| T              | 100.0 | 0.0   | 100.0 | 0.0   | 99.9 | 0.0   | 0.0   | 0.0   | 0.0   | 0.0   |
| deletion       | 0.0   | 0.0   | 0.0   | 0.0   | 0.0  | 0.0   | 0.0   | 0.0   | 0.0   | 0.0   |

  

| Canonical PE3   |       |       |      |     |     |       |       |     |       |      |
|-----------------|-------|-------|------|-----|-----|-------|-------|-----|-------|------|
| ALDOB +5GtoA(%) |       |       |      |     |     |       |       |     |       |      |
|                 | T     | G     | G    | C   | C   | G     | C     | C   | T     | G    |
| A               | 0.0   | 0.0   | 0.0  | 0.0 | 0.0 | 0.1   | 0.0   | 0.0 | 0.0   | 42.3 |
| C               | 0.0   | 100.0 | 99.9 | 0.0 | 0.0 | 100.0 | 100.0 | 0.0 | 0.0   | 57.7 |
| G               | 0.0   | 0.0   | 0.0  | 0.5 | 0.0 | 0.0   | 0.0   | 0.0 | 100.0 | 0.0  |
| T               | 100.0 | 0.0   | 0.1  | 0.0 | 0.0 | 0.0   | 0.0   | 0.0 | 0.0   | 0.0  |
| deletion        | 0.0   | 0.0   | 0.0  | 0.0 | 0.0 | 0.0   | 0.0   | 0.0 | 0.0   | 0.0  |

  

| xrPE            |       |       |      |      |      |      |       |       |      |      |
|-----------------|-------|-------|------|------|------|------|-------|-------|------|------|
| ALDOB +5GtoA(%) |       |       |      |      |      |      |       |       |      |      |
|                 | T     | G     | G    | C    | C    | G    | C     | C     | T    | G    |
| A               | 0.0   | 0.0   | 0.0  | 99.6 | 99.9 | 0.0  | 100.0 | 100.0 | 0.0  | 0.0  |
| C               | 0.0   | 100.0 | 99.9 | 0.0  | 0.0  | 99.9 | 0.0   | 0.0   | 0.1  | 41.8 |
| G               | 0.0   | 0.0   | 0.0  | 0.4  | 0.1  | 0.0  | 0.0   | 0.0   | 99.8 | 0.0  |
| T               | 100.0 | 0.0   | 0.0  | 0.0  | 0.0  | 0.0  | 0.0   | 0.0   | 0.0  | 0.0  |
| deletion        | 0.0   | 0.0   | 0.0  | 0.0  | 0.0  | 0.0  | 0.0   | 0.0   | 0.0  | 0.0  |

  

| Untreated       |       |       |       |       |       |      |      |       |      |      |
|-----------------|-------|-------|-------|-------|-------|------|------|-------|------|------|
| CTLA4 +1AtoC(%) |       |       |       |       |       |      |      |       |      |      |
|                 | A     | C     | A     | T     | G     | A    | T    | G     | G    | G    |
| A               | 100.0 | 0.0   | 100.0 | 0.0   | 0.0   | 98.2 | 0.0  | 0.0   | 0.0  | 0.1  |
| C               | 0.0   | 100.0 | 0.0   | 0.0   | 0.0   | 1.8  | 0.2  | 0.0   | 0.0  | 0.0  |
| G               | 0.0   | 0.0   | 0.0   | 0.0   | 100.0 | 0.0  | 0.0  | 100.0 | 99.7 | 99.9 |
| T               | 0.0   | 0.0   | 0.0   | 100.0 | 0.0   | 0.0  | 99.8 | 0.0   | 0.3  | 0.0  |
| deletion        | 0.0   | 0.0   | 0.0   | 0.0   | 0.0   | 0.0  | 0.0  | 0.0   | 0.0  | 0.0  |

  

| Canonical PE3   |       |       |       |       |       |      |      |       |       |       |
|-----------------|-------|-------|-------|-------|-------|------|------|-------|-------|-------|
| CTLA4 +1AtoC(%) |       |       |       |       |       |      |      |       |       |       |
|                 | A     | C     | A     | T     | G     | A    | T    | G     | G     | G     |
| A               | 100.0 | 0.0   | 100.0 | 0.0   | 0.0   | 96.5 | 0.0  | 0.0   | 0.0   | 0.0   |
| C               | 0.0   | 100.0 | 0.0   | 0.0   | 0.0   | 3.5  | 0.0  | 0.0   | 0.0   | 0.0   |
| G               | 0.0   | 0.0   | 0.0   | 0.0   | 100.0 | 0.0  | 0.0  | 100.0 | 100.0 | 100.0 |
| T               | 0.0   | 0.0   | 0.0   | 100.0 | 0.0   | 0.0  | 99.6 | 0.0   | 0.0   | 0.0   |
| deletion        | 0.0   | 0.0   | 0.0   | 0.0   | 0.0   | 0.0  | 0.3  | 0.0   | 0.0   | 0.0   |

  

| xrPE            |       |      |      |       |       |      |      |       |      |      |
|-----------------|-------|------|------|-------|-------|------|------|-------|------|------|
| CTLA4 +1AtoC(%) |       |      |      |       |       |      |      |       |      |      |
|                 | A     | C    | A    | T     | G     | A    | T    | G     | G    | G    |
| A               | 100.0 | 0.0  | 99.8 | 0.0   | 0.0   | 84.5 | 0.0  | 0.0   | 0.0  | 0.0  |
| C               | 0.0   | 99.9 | 0.0  | 0.0   | 0.0   | 15.4 | 0.0  | 0.0   | 0.0  | 0.0  |
| G               | 0.0   | 0.0  | 0.0  | 0.0   | 100.0 | 0.0  | 0.0  | 100.0 | 99.6 | 99.8 |
| T               | 0.0   | 0.0  | 0.0  | 100.0 | 0.0   | 0.0  | 99.6 | 0.0   | 0.1  | 0.0  |
| deletion        | 0.0   | 0.0  | 0.2  | 0.0   | 0.0   | 0.2  | 0.3  | 0.0   | 0.3  | 0.2  |

  

| Untreated      |       |       |       |       |       |       |       |       |      |       |
|----------------|-------|-------|-------|-------|-------|-------|-------|-------|------|-------|
| EGFR +1TtoA(%) |       |       |       |       |       |       |       |       |      |       |
|                | T     | G     | A     | G     | A     | T     | G     | G     | A    | G     |
| A              | 0.0   | 0.0   | 100.0 | 0.0   | 100.0 | 0.0   | 0.0   | 0.0   | 99.9 | 0.0   |
| C              | 0.0   | 0.0   | 0.0   | 0.0   | 0.0   | 0.0   | 0.0   | 0.0   | 0.0  | 0.0   |
| G              | 0.0   | 100.0 | 0.0   | 100.0 | 0.0   | 0.0   | 100.0 | 100.0 | 0.0  | 100.0 |
| T              | 100.0 | 0.0   | 0.0   | 0.0   | 0.0   | 100.0 | 0.0   | 0.0   | 0.0  | 0.0   |
| deletion       | 0.0   | 0.0   | 0.0   | 0.0   | 0.0   | 0.0   | 0.0   | 0.0   | 0.0  | 0.0   |

  

| Canonical PE3  |       |       |       |       |       |      |       |       |      |       |
|----------------|-------|-------|-------|-------|-------|------|-------|-------|------|-------|
| EGFR +1TtoA(%) |       |       |       |       |       |      |       |       |      |       |
|                | T     | G     | A     | G     | A     | T    | G     | G     | A    | G     |
| A              | 0.0   | 0.0   | 100.0 | 0.0   | 100.0 | 5.3  | 0.0   | 0.0   | 99.9 | 0.0   |
| C              | 0.0   | 0.0   | 0.0   | 0.0   | 0.0   | 0.0  | 0.0   | 0.0   | 0.0  | 0.0   |
| G              | 0.0   | 100.0 | 0.0   | 100.0 | 0.0   | 0.0  | 100.0 | 100.0 | 0.1  | 100.0 |
| T              | 100.0 | 0.0   | 0.0   | 0.0   | 0.0   | 94.7 | 0.0   | 0.0   | 0.0  | 0.0   |
| deletion       | 0.0   | 0.0   | 0.0   | 0.0   | 0.0   | 0.0  | 0.0   | 0.0   | 0.0  | 0.0   |

  

| xrPE           |       |       |       |       |       |      |       |       |      |       |
|----------------|-------|-------|-------|-------|-------|------|-------|-------|------|-------|
| EGFR +1TtoA(%) |       |       |       |       |       |      |       |       |      |       |
|                | T     | G     | A     | G     | A     | T    | G     | G     | A    | G     |
| A              | 0.0   | 0.0   | 100.0 | 0.0   | 100.0 | 18.1 | 0.0   | 0.0   | 99.9 | 0.0   |
| C              | 0.0   | 0.0   | 0.0   | 0.0   | 0.0   | 0.0  | 0.0   | 0.0   | 0.0  | 0.0   |
| G              | 0.0   | 100.0 | 0.0   | 100.0 | 0.0   | 0.0  | 100.0 | 100.0 | 0.0  | 100.0 |
| T              | 100.0 | 0.0   | 0.0   | 0.0   | 0.0   | 81.9 | 0.0   | 0.0   | 0.0  | 0.0   |
| deletion       | 0.0   | 0.0   | 0.0   | 0.0   | 0.0   | 0.0  | 0.0   | 0.0   | 0.0  | 0.0   |

  

| Untreated         |       |       |       |       |       |       |       |       |       |       |
|-------------------|-------|-------|-------|-------|-------|-------|-------|-------|-------|-------|
| FAM171B +1CtoG(%) |       |       |       |       |       |       |       |       |       |       |
|                   | C     | T     | C     | C     | A     | C     | A     | C     | C     | G     |
| A                 | 0.0   | 0.0   | 0.0   | 0.0   | 100.0 | 0.0   | 100.0 | 0.0   | 0.0   | 0.0   |
| C                 | 100.0 | 0.0   | 100.0 | 100.0 | 0.0   | 100.0 | 0.0   | 100.0 | 100.0 | 0.0   |
| G                 | 0.0   | 0.0   | 0.0   | 0.0   | 0.0   | 0.0   | 0.0   | 0.0   | 0.0   | 100.0 |
| T                 | 0.0   | 100.0 | 0.0   | 0.0   | 0.0   | 0.0   | 0.0   | 0.0   | 0.0   | 0.0   |
| deletion          | 0.0   | 0.0   | 0.0   | 0.0   | 0.0   | 0.0   | 0.0   | 0.0   | 0.0   | 0.0   |

  

| Canonical PE3     |       |       |       |       |       |      |       |       |       |       |
|-------------------|-------|-------|-------|-------|-------|------|-------|-------|-------|-------|
| FAM171B +1CtoG(%) |       |       |       |       |       |      |       |       |       |       |
|                   | C     | T     | C     | C     | A     | C    | A     | C     | C     | G     |
| A                 | 0.0   | 0.0   | 0.0   | 0.0   | 100.0 | 0.0  | 100.0 | 0.0   | 0.0   | 0.0   |
| C                 | 100.0 | 0.0   | 100.0 | 100.0 | 0.0   | 98.6 | 0.0   | 100.0 | 100.0 | 0.0   |
| G                 | 0.0   | 0.0   | 0.0   | 0.0   | 0.0   | 1.3  | 0.0   | 0.0   | 0.0   | 100.0 |
| T                 | 0.0   | 100.0 | 0.0   | 0.0   | 0.0   | 0.0  | 0.0   | 0.0   | 0.0   | 0.0   |
| deletion          | 0.0   | 0.0   | 0.0   | 0.0   | 0.0   | 0.0  | 0.0   | 0.0   | 0.0   | 0.0   |

  

| xrPE              |       |       |       |       |       |      |       |       |       |       |
|-------------------|-------|-------|-------|-------|-------|------|-------|-------|-------|-------|
| FAM171B +1CtoG(%) |       |       |       |       |       |      |       |       |       |       |
|                   | C     | T     | C     | C     | A     | C    | A     | C     | C     | G     |
| A                 | 0.0   | 0.0   | 0.0   | 0.0   | 100.0 | 0.0  | 100.0 | 0.0   | 0.0   | 0.0   |
| C                 | 100.0 | 0.0   | 100.0 | 100.0 | 0.0   | 90.8 | 0.0   | 100.0 | 100.0 | 0.0   |
| G                 | 0.0   | 0.0   | 0.0   | 0.0   | 0.0   | 9.2  | 0.0   | 0.0   | 0.0   | 100.0 |
| T                 | 0.0   | 100.0 | 0.0   | 0.0   | 0.0   | 0.0  | 0.0   | 0.0   | 0.0   | 0.0   |
| deletion          | 0.0   | 0.0   | 0.0   | 0.0   | 0.0   | 0.0  | 0.0   | 0.0   | 0.0   | 0.0   |

  

| Untreated        |       |      |       |       |       |       |       |      |       |       |
|------------------|-------|------|-------|-------|-------|-------|-------|------|-------|-------|
| FAMCF1 +1GtoA(%) |       |      |       |       |       |       |       |      |       |       |
|                  | C     | T    | T     | T     | G     | G     | G     | C    | G     | G     |
| A                | 0.0   | 0.0  | 0.0   | 0.0   | 0.0   | 0.0   | 0.0   | 0.0  | 0.0   | 0.0   |
| C                | 100.0 | 0.0  | 0.0   | 0.0   | 0.0   | 0.0   | 0.0   | 99.8 | 0.0   | 0.0   |
| G                | 0.0   | 0.0  | 0.0   | 0.0   | 100.0 | 100.0 | 100.0 | 0.0  | 100.0 | 100.0 |
| T                | 0.0   | 99.9 | 100.0 | 100.0 | 0.0   | 0.0   | 0.0   | 0.2  | 0.0   | 0.0   |
| deletion         | 0.0   | 0.0  | 0.0   | 0.0   | 0.0   | 0.0   | 0.0   | 0.0  | 0.0   | 0.0   |

  

| Canonical PE3    |       |       |       |       |       |      |       |      |       |      |
|------------------|-------|-------|-------|-------|-------|------|-------|------|-------|------|
| FAMCF1 +1GtoA(%) |       |       |       |       |       |      |       |      |       |      |
|                  | C     | T     | T     | T     | G     | G    | G     | C    | G     | G    |
| A                | 0.0   | 0.0   | 0.0   | 0.0   | 0.0   | 94.9 | 0.0   | 0.0  | 0.0   | 0.0  |
| C                | 100.0 | 0.0   | 0.0   | 0.0   | 0.0   | 0.0  | 0.0   | 99.8 | 0.0   | 0.0  |
| G                | 0.0   | 0.0   | 0.0   | 0.0   | 100.0 | 85.3 | 100.0 | 0.0  | 100.0 | 99.8 |
| T                | 0.0   | 100.0 | 100.0 | 100.0 | 0.0   | 0.0  | 0.0   | 0.2  | 0.0   | 0.0  |
| deletion         | 0.0   | 0.0   | 0.0   | 0.0   | 0.0   | 0.0  | 0.0   | 0.0  | 0.0   | 0.1  |

  

| xrPE             |       |      |       |       |       |      |       |      |       |      |
|------------------|-------|------|-------|-------|-------|------|-------|------|-------|------|
| FAMCF1 +1GtoA(%) |       |      |       |       |       |      |       |      |       |      |
|                  | C     | T    | T     | T     | G     | G    | G     | C    | G     | G    |
| A                | 0.0   | 0.0  | 0.0   | 0.0   | 0.0   | 0.0  | 30.7  | 0.0  | 0.0   | 0.0  |
| C                | 100.0 | 0.0  | 0.0   | 0.0   | 0.0   | 0.0  | 0.0   | 99.8 | 0.0   | 0.0  |
| G                | 0.0   | 0.0  | 0.0   | 0.0   | 100.0 | 69.3 | 100.0 | 0.0  | 100.0 | 99.8 |
| T                | 0.0   | 99.9 | 100.0 | 100.0 | 0.0   | 0.0  | 0.0   | 0.2  | 0.0   | 0.0  |
| deletion         | 0.0   | 0.0  | 0.0   | 0.0   | 0.0   | 0.0  | 0.0   | 0.0  | 0.0   | 0.2  |

**Supplementary Fig. 15: Minimal levels of potential base conversion byproduct induced by canonical PE3 and xrPE at 15 edited sites in HEK293T cells.** Analysis of potential base-change byproducts associated with PE3- and xrPE-dependent base conversions (shown in Fig. 3b and Supplementary Fig. 8a). The red triangles indicate the nCas9 nick site. The surrounding 10 bp sequences are shown. Light blue and light red indicate wild type base. The dark red indicates the desired base substitution. The data presented is representative of three independent measurements. Source data are provided as a Source Data file.

| Untreated      |       |       |       |       |       |       |       |       |      |
|----------------|-------|-------|-------|-------|-------|-------|-------|-------|------|
| FBM1 +2CtoA(%) |       |       |       |       |       |       |       |       |      |
| A              | 0.0   | 0.0   | 0.0   | 0.0   | 0.0   | 0.0   | 0.0   | 0.0   | 0.0  |
| C              | 0.0   | 0.0   | 0.0   | 0.0   | 100.0 | 0.0   | 100.0 | 0.0   | 0.0  |
| G              | 0.0   | 100.0 | 0.0   | 0.0   | 0.0   | 0.0   | 0.0   | 100.0 | 99.9 |
| T              | 100.0 | 0.0   | 100.0 | 100.0 | 0.0   | 100.0 | 0.0   | 99.9  | 0.0  |
| deletion       | 0.0   | 0.0   | 0.0   | 0.0   | 0.0   | 0.0   | 0.0   | 0.0   | 0.0  |
| Canonical PE3  |       |       |       |       |       |       |       |       |      |
| FBM1 +2CtoA(%) |       |       |       |       |       |       |       |       |      |
| A              | 0.0   | 0.0   | 0.0   | 0.0   | 0.0   | 0.0   | 4.1   | 0.0   | 0.0  |
| C              | 0.0   | 0.0   | 0.0   | 0.0   | 100.0 | 0.0   | 95.5  | 0.0   | 0.0  |
| G              | 0.0   | 100.0 | 0.0   | 0.0   | 0.0   | 0.0   | 0.0   | 100.0 | 99.9 |
| T              | 100.0 | 0.0   | 100.0 | 100.0 | 0.0   | 100.0 | 0.0   | 99.9  | 0.0  |
| deletion       | 0.0   | 0.0   | 0.0   | 0.0   | 0.0   | 0.4   | 0.0   | 0.0   | 0.0  |
| xPE            |       |       |       |       |       |       |       |       |      |
| FBM1 +2CtoA(%) |       |       |       |       |       |       |       |       |      |
| A              | 0.0   | 0.0   | 0.0   | 0.0   | 0.0   | 0.0   | 17.0  | 0.0   | 0.0  |
| C              | 0.0   | 0.0   | 0.0   | 0.0   | 100.0 | 0.0   | 81.7  | 0.0   | 0.0  |
| G              | 0.0   | 100.0 | 0.0   | 0.0   | 0.0   | 0.0   | 0.0   | 100.0 | 99.9 |
| T              | 100.0 | 0.0   | 100.0 | 100.0 | 0.0   | 100.0 | 0.0   | 99.9  | 0.0  |
| deletion       | 0.0   | 0.0   | 0.0   | 0.0   | 0.0   | 1.3   | 0.0   | 0.0   | 0.0  |

  

| Untreated      |       |       |       |      |       |       |     |       |       |
|----------------|-------|-------|-------|------|-------|-------|-----|-------|-------|
| HEXA +1AtoG(%) |       |       |       |      |       |       |     |       |       |
| A              | 0.0   | 0.0   | 0.0   | 0.1  | 0.0   | 99.8  | 0.0 | 0.0   | 0.0   |
| C              | 100.0 | 0.0   | 0.0   | 0.0  | 100.0 | 0.0   | 0.0 | 100.0 | 0.0   |
| G              | 0.0   | 0.0   | 100.0 | 99.9 | 0.0   | 0.2   | 0.0 | 0.0   | 100.0 |
| T              | 0.0   | 100.0 | 0.0   | 0.0  | 0.0   | 100.0 | 0.0 | 100.0 | 0.0   |
| deletion       | 0.0   | 0.0   | 0.0   | 0.0  | 0.0   | 0.0   | 0.0 | 0.0   | 0.0   |
| Canonical PE3  |       |       |       |      |       |       |     |       |       |
| HEXA +1AtoG(%) |       |       |       |      |       |       |     |       |       |
| A              | 0.0   | 0.0   | 0.0   | 0.1  | 0.0   | 86.8  | 0.0 | 0.0   | 0.0   |
| C              | 100.0 | 0.0   | 0.0   | 0.0  | 100.0 | 0.0   | 0.0 | 100.0 | 0.0   |
| G              | 0.0   | 0.0   | 100.0 | 99.9 | 0.0   | 13.1  | 0.0 | 0.0   | 100.0 |
| T              | 0.0   | 100.0 | 0.0   | 0.0  | 0.0   | 100.0 | 0.0 | 100.0 | 0.0   |
| deletion       | 0.0   | 0.0   | 0.0   | 0.0  | 0.0   | 0.0   | 0.0 | 0.0   | 0.0   |
| xPE            |       |       |       |      |       |       |     |       |       |
| HEXA +1AtoG(%) |       |       |       |      |       |       |     |       |       |
| A              | 0.0   | 0.0   | 0.0   | 0.1  | 0.0   | 66.1  | 0.0 | 0.0   | 0.0   |
| C              | 100.0 | 0.0   | 0.0   | 0.0  | 100.0 | 0.0   | 0.0 | 100.0 | 0.0   |
| G              | 0.0   | 0.0   | 100.0 | 99.9 | 0.0   | 33.9  | 0.0 | 0.0   | 100.0 |
| T              | 0.0   | 100.0 | 0.0   | 0.0  | 0.0   | 100.0 | 0.0 | 100.0 | 0.0   |
| deletion       | 0.0   | 0.0   | 0.0   | 0.0  | 0.0   | 0.0   | 0.0 | 0.0   | 0.0   |

  

| Untreated      |       |       |       |       |       |       |       |     |       |
|----------------|-------|-------|-------|-------|-------|-------|-------|-----|-------|
| PRNP +1TtoA(%) |       |       |       |       |       |       |       |     |       |
| A              | 0.0   | 0.0   | 0.0   | 0.0   | 100.0 | 0.0   | 0.0   | 0.0 | 0.0   |
| C              | 100.0 | 0.0   | 0.0   | 0.0   | 0.0   | 0.0   | 99.9  | 0.0 | 0.0   |
| G              | 0.0   | 0.0   | 100.0 | 100.0 | 0.0   | 0.0   | 100.0 | 0.0 | 100.0 |
| T              | 0.0   | 100.0 | 0.0   | 0.0   | 0.0   | 100.0 | 0.0   | 0.1 | 100.0 |
| deletion       | 0.0   | 0.0   | 0.0   | 0.0   | 0.0   | 0.0   | 0.0   | 0.0 | 0.0   |
| Canonical PE3  |       |       |       |       |       |       |       |     |       |
| PRNP +1TtoA(%) |       |       |       |       |       |       |       |     |       |
| A              | 0.0   | 0.0   | 0.0   | 0.0   | 99.8  | 17.0  | 0.0   | 0.0 | 0.0   |
| C              | 100.0 | 0.0   | 0.0   | 0.0   | 0.0   | 0.0   | 100.0 | 0.0 | 0.0   |
| G              | 0.0   | 0.0   | 100.0 | 100.0 | 0.0   | 0.0   | 100.0 | 0.0 | 100.0 |
| T              | 0.0   | 100.0 | 0.0   | 0.0   | 0.0   | 83.0  | 0.0   | 0.0 | 100.0 |
| deletion       | 0.0   | 0.0   | 0.0   | 0.0   | 0.1   | 0.0   | 0.0   | 0.0 | 0.0   |
| xPE            |       |       |       |       |       |       |       |     |       |
| PRNP +1TtoA(%) |       |       |       |       |       |       |       |     |       |
| A              | 0.0   | 0.0   | 0.0   | 0.0   | 100.0 | 22.3  | 0.0   | 0.0 | 0.1   |
| C              | 100.0 | 0.0   | 0.0   | 0.0   | 0.0   | 0.0   | 100.0 | 0.0 | 0.0   |
| G              | 0.0   | 0.0   | 100.0 | 100.0 | 0.0   | 0.0   | 100.0 | 0.0 | 99.9  |
| T              | 0.0   | 100.0 | 0.0   | 0.0   | 0.0   | 77.7  | 0.0   | 0.0 | 100.0 |
| deletion       | 0.0   | 0.0   | 0.0   | 0.0   | 0.0   | 0.0   | 0.0   | 0.0 | 0.0   |

  

| Untreated      |       |       |       |       |       |       |      |       |      |
|----------------|-------|-------|-------|-------|-------|-------|------|-------|------|
| RNF2 +1CtoG(%) |       |       |       |       |       |       |      |       |      |
| A              | 0.0   | 0.0   | 100.0 | 100.0 | 0.0   | 0.0   | 0.0  | 99.9  | 0.0  |
| C              | 0.0   | 0.0   | 0.0   | 0.0   | 0.0   | 100.0 | 0.1  | 0.0   | 0.0  |
| G              | 100.0 | 100.0 | 0.0   | 0.0   | 100.0 | 0.0   | 0.0  | 100.0 | 99.6 |
| T              | 0.0   | 0.0   | 0.0   | 0.0   | 0.0   | 0.0   | 99.9 | 0.0   | 0.4  |
| deletion       | 0.0   | 0.0   | 0.0   | 0.0   | 0.0   | 0.0   | 0.0  | 0.0   | 0.0  |
| Canonical PE3  |       |       |       |       |       |       |      |       |      |
| RNF2 +1CtoG(%) |       |       |       |       |       |       |      |       |      |
| A              | 0.0   | 0.0   | 100.0 | 100.0 | 0.0   | 0.0   | 0.0  | 100.0 | 0.0  |
| C              | 0.0   | 0.0   | 0.0   | 0.0   | 0.0   | 71.1  | 0.1  | 0.0   | 0.0  |
| G              | 100.0 | 100.0 | 0.0   | 0.0   | 99.7  | 28.9  | 0.0  | 100.0 | 99.9 |
| T              | 0.0   | 0.0   | 0.0   | 0.0   | 0.0   | 0.0   | 99.9 | 0.0   | 0.1  |
| deletion       | 0.0   | 0.0   | 0.0   | 0.0   | 0.2   | 0.0   | 0.0  | 0.0   | 0.0  |
| xPE            |       |       |       |       |       |       |      |       |      |
| RNF2 +1CtoG(%) |       |       |       |       |       |       |      |       |      |
| A              | 0.0   | 0.0   | 100.0 | 100.0 | 0.0   | 0.0   | 0.0  | 100.0 | 0.0  |
| C              | 0.0   | 0.0   | 0.0   | 0.0   | 0.0   | 53.5  | 0.0  | 0.0   | 0.0  |
| G              | 100.0 | 100.0 | 0.0   | 0.0   | 99.9  | 46.5  | 0.0  | 100.0 | 99.9 |
| T              | 0.0   | 0.0   | 0.0   | 0.0   | 0.0   | 0.0   | 99.9 | 0.0   | 0.1  |
| deletion       | 0.0   | 0.0   | 0.0   | 0.0   | 0.1   | 0.0   | 0.0  | 0.0   | 0.0  |

  

| Untreated       |       |       |       |     |       |       |       |       |     |
|-----------------|-------|-------|-------|-----|-------|-------|-------|-------|-----|
| MAAVS1+1GtoC(%) |       |       |       |     |       |       |       |       |     |
| A               | 0.0   | 0.0   | 0.0   | 0.0 | 100.0 | 0.0   | 0.0   | 100.0 | 0.0 |
| C               | 0.0   | 0.0   | 0.0   | 0.0 | 0.0   | 0.0   | 0.0   | 100.0 | 0.0 |
| G               | 100.0 | 0.0   | 0.0   | 0.0 | 0.0   | 100.0 | 100.0 | 0.0   | 0.0 |
| T               | 0.0   | 100.0 | 100.0 | 0.0 | 0.0   | 0.0   | 0.0   | 0.0   | 0.0 |
| deletion        | 0.0   | 0.0   | 0.0   | 0.0 | 0.0   | 0.0   | 0.0   | 0.0   | 0.0 |
| Canonical PE3   |       |       |       |     |       |       |       |       |     |
| MAAVS1+1GtoC(%) |       |       |       |     |       |       |       |       |     |
| A               | 0.0   | 0.0   | 0.0   | 0.0 | 100.0 | 0.0   | 0.0   | 100.0 | 0.0 |
| C               | 0.0   | 0.0   | 0.0   | 0.0 | 0.0   | 8.8   | 0.0   | 100.0 | 0.0 |
| G               | 99.8  | 0.0   | 0.0   | 0.0 | 0.0   | 91.2  | 100.0 | 0.0   | 0.0 |
| T               | 0.0   | 100.0 | 100.0 | 0.0 | 0.0   | 0.0   | 0.0   | 0.0   | 0.0 |
| deletion        | 0.2   | 0.0   | 0.0   | 0.0 | 0.0   | 0.0   | 0.0   | 0.0   | 0.0 |
| xPE             |       |       |       |     |       |       |       |       |     |
| MAAVS1+1GtoC(%) |       |       |       |     |       |       |       |       |     |
| A               | 0.0   | 0.0   | 0.0   | 0.0 | 100.0 | 0.0   | 0.0   | 100.0 | 0.0 |
| C               | 0.0   | 0.0   | 0.0   | 0.0 | 0.0   | 16.6  | 0.0   | 100.0 | 0.0 |
| G               | 100.0 | 0.0   | 0.0   | 0.0 | 0.0   | 83.4  | 100.0 | 0.0   | 0.0 |
| T               | 0.0   | 100.0 | 100.0 | 0.0 | 0.0   | 0.0   | 0.0   | 0.0   | 0.0 |
| deletion        | 0.0   | 0.0   | 0.0   | 0.0 | 0.0   | 0.0   | 0.0   | 0.0   | 0.0 |

  

| Untreated     |       |       |       |       |       |       |      |       |       |
|---------------|-------|-------|-------|-------|-------|-------|------|-------|-------|
| PD1 +2CtoA(%) |       |       |       |       |       |       |      |       |       |
| A             | 0.0   | 100.0 | 0.0   | 0.0   | 99.9  | 0.0   | 0.0  | 0.0   | 0.0   |
| C             | 100.0 | 0.0   | 0.0   | 0.0   | 0.0   | 0.0   | 99.9 | 0.0   | 0.0   |
| G             | 0.0   | 0.0   | 0.0   | 100.0 | 0.0   | 100.0 | 0.0  | 100.0 | 100.0 |
| T             | 0.0   | 0.0   | 100.0 | 0.0   | 0.0   | 0.0   | 0.0  | 0.0   | 100.0 |
| deletion      | 0.0   | 0.0   | 0.0   | 0.0   | 0.0   | 0.0   | 0.0  | 0.0   | 0.0   |
| Canonical PE3 |       |       |       |       |       |       |      |       |       |
| PD1 +2CtoA(%) |       |       |       |       |       |       |      |       |       |
| A             | 0.0   | 100.0 | 0.0   | 0.0   | 99.9  | 0.0   | 4.0  | 0.0   | 0.0   |
| C             | 100.0 | 0.0   | 0.0   | 0.0   | 0.0   | 0.0   | 95.9 | 0.0   | 0.0   |
| G             | 0.0   | 0.0   | 0.0   | 100.0 | 0.0   | 100.0 | 0.0  | 100.0 | 100.0 |
| T             | 0.0   | 0.0   | 100.0 | 0.0   | 0.0   | 0.0   | 0.1  | 0.0   | 100.0 |
| deletion      | 0.0   | 0.0   | 0.0   | 0.0   | 0.0   | 0.0   | 0.0  | 0.0   | 0.0   |
| xPE           |       |       |       |       |       |       |      |       |       |
| PD1 +2CtoA(%) |       |       |       |       |       |       |      |       |       |
| A             | 0.0   | 100.0 | 0.0   | 0.0   | 100.0 | 0.0   | 7.9  | 0.0   | 0.0   |
| C             | 100.0 | 0.0   | 0.0   | 0.0   | 0.0   | 0.0   | 92.1 | 0.0   | 0.0   |
| G             | 0.0   | 0.0   | 0.0   | 100.0 | 0.0   | 100.0 | 0.0  | 100.0 | 100.0 |
| T             | 0.0   | 0.0   | 100.0 | 0.0   | 0.0   | 0.0   | 0.0  | 0.0   | 100.0 |
| deletion      | 0.0   | 0.0   | 0.0   | 0.0   | 0.0   | 0.0   | 0.0  | 0.0   | 0.0   |

  

| Untreated      |       |       |       |       |       |       |       |       |       |
|----------------|-------|-------|-------|-------|-------|-------|-------|-------|-------|
| RIT1 +4GtoA(%) |       |       |       |       |       |       |       |       |       |
| A              | 0.0   | 100.0 | 0.0   | 0.0   | 100.0 | 100.0 | 0.0   | 0.0   | 0.0   |
| C              | 0.0   | 0.0   | 100.0 | 100.0 | 0.0   | 0.0   | 100.0 | 0.0   | 0.0   |
| G              | 0.0   | 0.0   | 0.0   | 0.0   | 0.0   | 0.0   | 0.0   | 0.0   | 100.0 |
| T              | 100.0 | 0.0   | 0.0   | 0.0   | 0.0   | 0.0   | 0.0   | 100.0 | 0.0   |
| deletion       | 0.0   | 0.0   | 0.0   | 0.0   | 0.0   | 0.0   | 0.0   | 0.0   | 0.0   |
| Canonical PE3  |       |       |       |       |       |       |       |       |       |
| RIT1 +4GtoA(%) |       |       |       |       |       |       |       |       |       |
| A              | 0.0   | 100.0 | 0.0   | 0.0   | 99.6  | 99.8  | 0.0   | 0.0   | 46.4  |
| C              | 0.0   | 0.0   | 100.0 | 99.4  | 0.0   | 0.0   | 99.7  | 0.0   | 0.1   |
| G              | 0.0   | 0.0   | 0.0   | 0.0   | 0.0   | 0.0   | 0.0   | 0.0   | 53.5  |
| T              | 100.0 | 0.0   | 0.0   | 0.0   | 0.0   | 0.0   | 0.0   | 100.0 | 0.0   |
| deletion       | 0.0   | 0.0   | 0.0   | 0.6   | 0.4   | 0.1   | 0.2   | 0.0   | 0.0   |
| xPE            |       |       |       |       |       |       |       |       |       |
| RIT1 +4GtoA(%) |       |       |       |       |       |       |       |       |       |
| A              | 0.0   | 99.3  | 0.0   | 0.0   | 99.8  | 99.5  | 0.0   | 0.0   | 79.9  |
| C              | 0.0   | 0.0   | 99.3  | 99.8  | 0.0   | 0.0   | 100.0 | 0.0   | 0.0   |
| G              | 0.0   | 0.0   | 0.0   | 0.0   | 0.0   | 0.0   | 0.0   | 0.0   | 20.1  |
| T              | 100.0 | 0.0   | 0.0   | 0.0   | 0.0   | 0.0   | 0.0   | 99.4  | 0.0   |
| deletion       | 0.0   | 0.7   | 0.7   | 0.0   | 0.2   | 0.5   | 0.0   | 0.6   | 0.0   |

Supplementary Fig. 15 (continued)

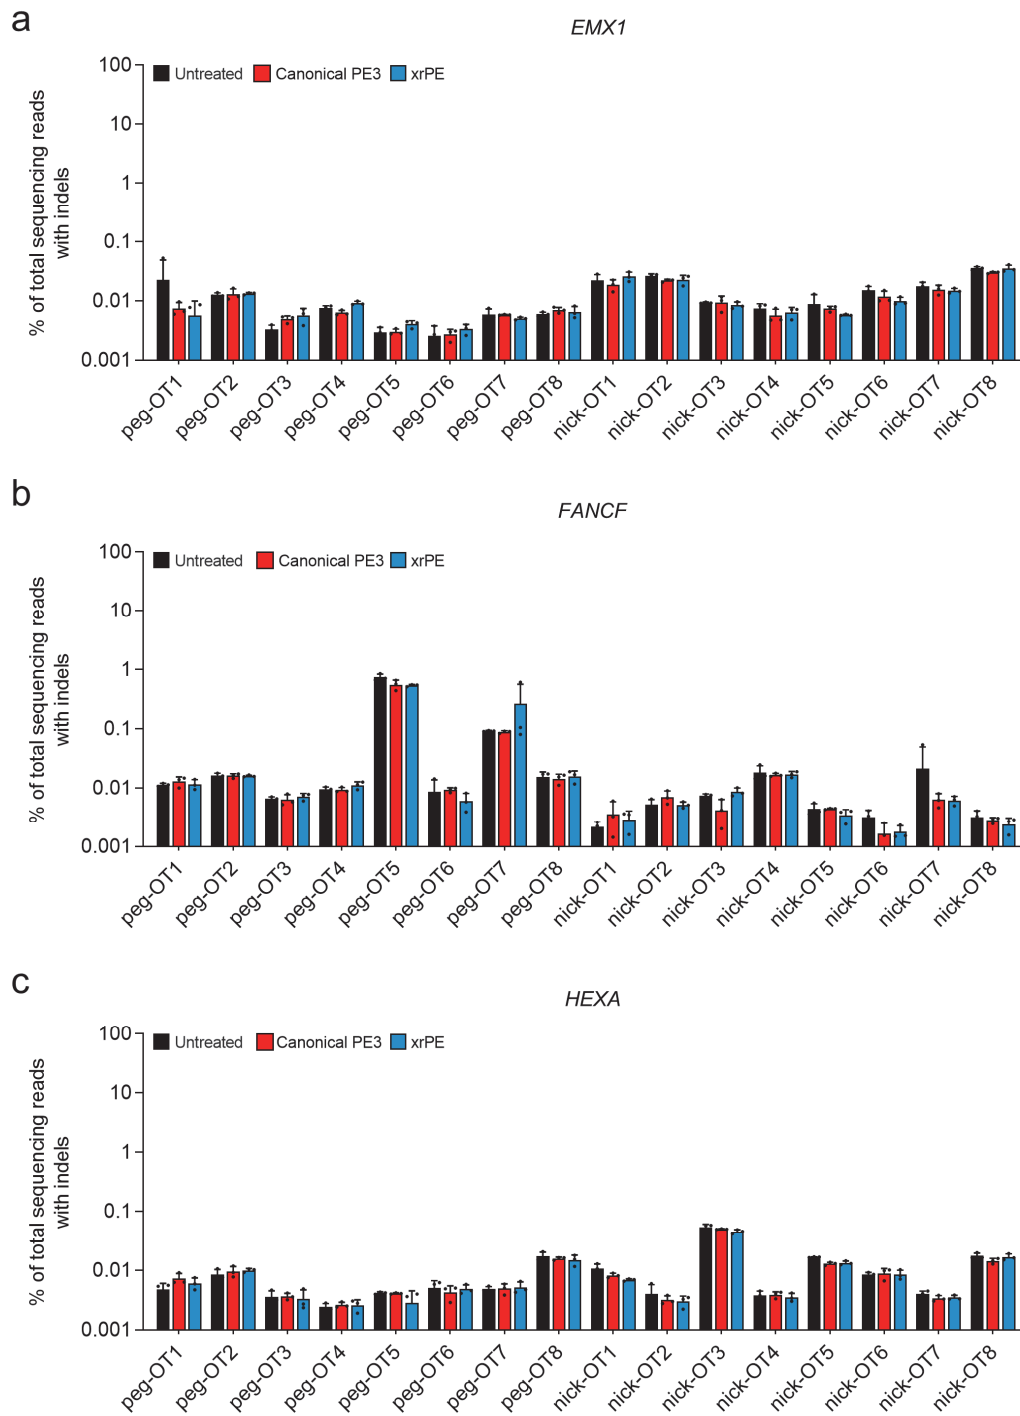

**Supplementary Fig. 16: Comparison of potential off-target rates for canonical PE3 and xrPE in 3 prime editing applications in HEK293T cells.**

- Off-target analysis for PE3- and xrPE-mediated targeting of *EMX1*.
- Off-target analysis for PE3- and xrPE-mediated targeting of *FANCF*.
- Off-target analysis for PE3- and xrPE-mediated targeting of *HEXA*. In **a-c**, data are presented as mean values  $\pm$  SD (n = 3 biological replicates). Source data are provided as a Source Data file.

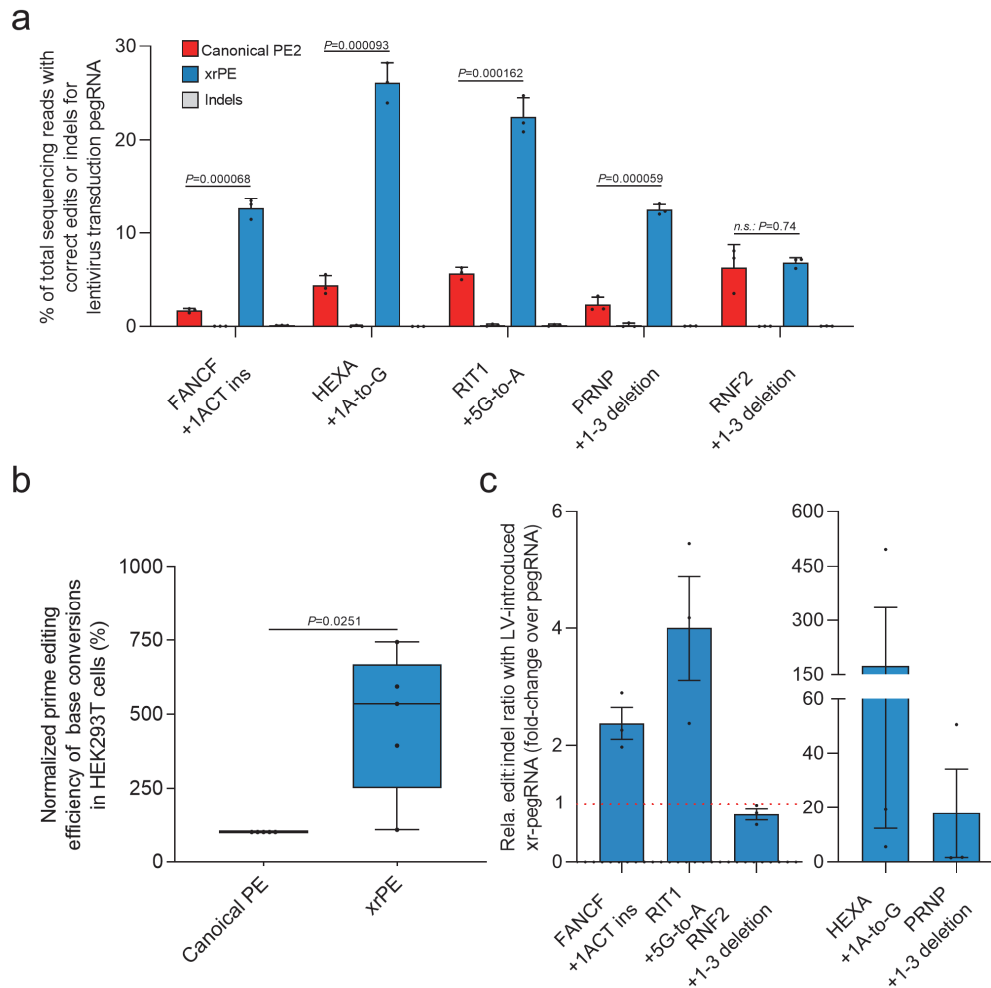

**Supplementary Fig. 17: Lentiviral vector-introduced xr-pegRNA increased prime editing efficiencies by PE2 in HEK293T cells.**

- a.** HEK293T cells were transduced with WT pegRNAs or xr-pegRNAs in lentiviral vectors (LV). Six days after transduction, cells were further transfected with the PE2 plasmid for 4 days. Correct editing efficiencies were determined by deep-sequencing. The editing efficiencies were shown by red/blue-colored bars (mean  $\pm$  SD,  $n=3$  biological replicates). The grey bars immediately next to the red/blue-colored bars indicate the indel frequencies associated with each editing group. Two-tailed student's *t*-tests were performed. *P* values are marked on the graph (*n.s.*: not significant).
- b.** The results in **(a)** are further analyzed by considering editing at all sites ( $n=5$ ) as a whole. The editing frequencies induced by WT pegRNAs were set as 100%. In the box plot, each data point represents the averaged editing activity at the particular site. The center line shows medians of all

data points and the box limits correspond to the upper the lower quartiles, while the whiskers extend to the largest and smallest values. Two-tailed one-sample student's t-test was performed (with *P* value marked).

- c. Relative edit:indel ratios associated with prime editing by LV-introduced xr-pegRNAs (with PE2) are presented (mean  $\pm$  SEM, n = 3 biological replicates). The levels of the WT pegRNA group were set as 1 (the red dashed line). The results correspond to those shown in (a).

Source data are provided as a Source Data file.

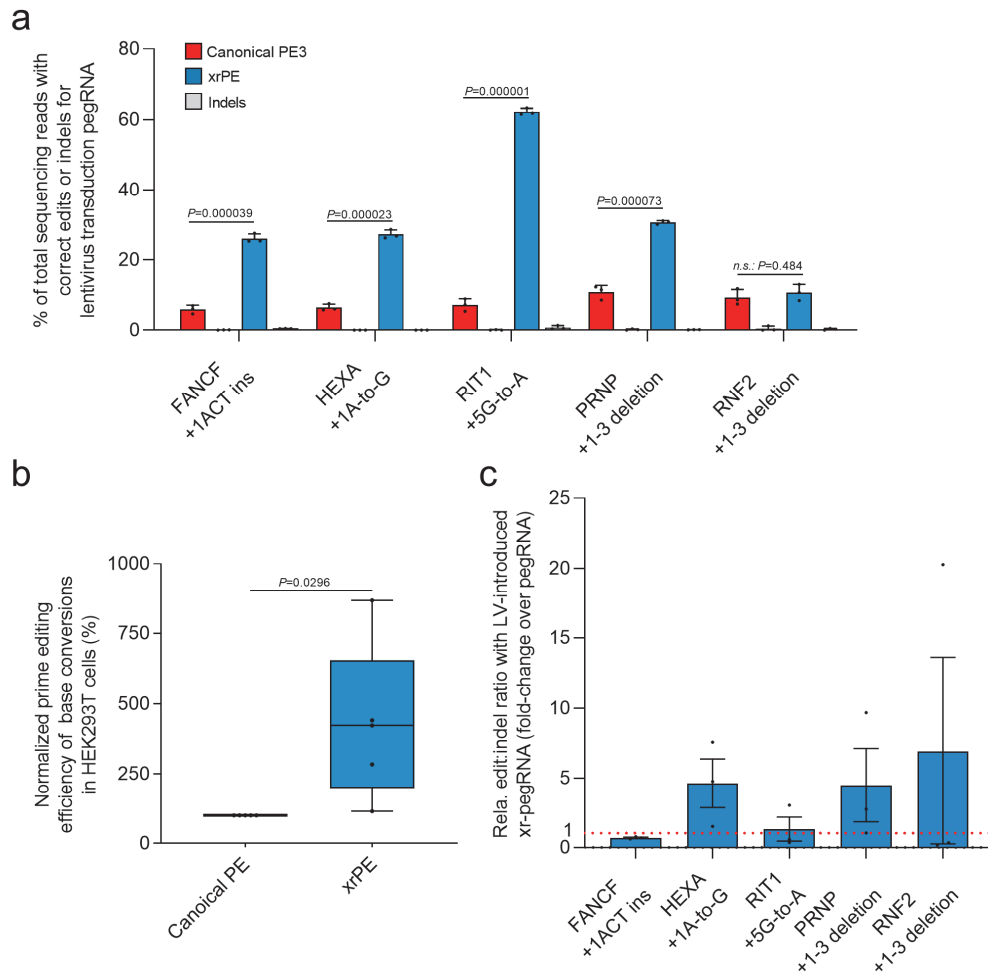

**Supplementary Fig. 18: Lentiviral vector-introduced xr-pegRNA increased prime editing efficiencies by PE3 in HEK293T cells.**

- a.** HEK293T cells were transduced with WT pegRNAs or xr-pegRNAs in LV. Six days after transduction, cells were further transfected with the PE3 plasmid for 4 days. Correct editing efficiencies were determined by deep-sequencing. The editing efficiencies were shown by red/blue-colored bars (mean  $\pm$  SD,  $n=3$  biological replicates). The grey bars immediately next to the red/blue-colored bars indicate the indel frequencies associated with each editing group. Two-tailed student's t-tests were performed.  $P$  values are marked on the graph (*n.s.*: not significant).
- b.** The results in (a) are further analyzed by considering editing at all sites ( $n=5$ ) as a whole (mean  $\pm$  SD). The editing frequencies induced by WT pegRNAs were set as 100%. In the box plot, each data point represents the averaged editing activity at the particular site. The center line shows medians of all data points and the box limits correspond to the upper the lower quartiles, while the

whiskers extend to the largest and smallest values. One-tailed one-sample student's t-test was performed (with *P* value marked).

- c. Relative edit:indel ratios associated with prime editing by LV-introduced xr-pegRNAs (with PE3) are presented ( $\pm$  SEM,  $n = 3$ ). The levels of the WT pegRNA group were set as 1 (the red dashed line). The results correspond to those shown in (a).

Source data are provided as a Source Data file.



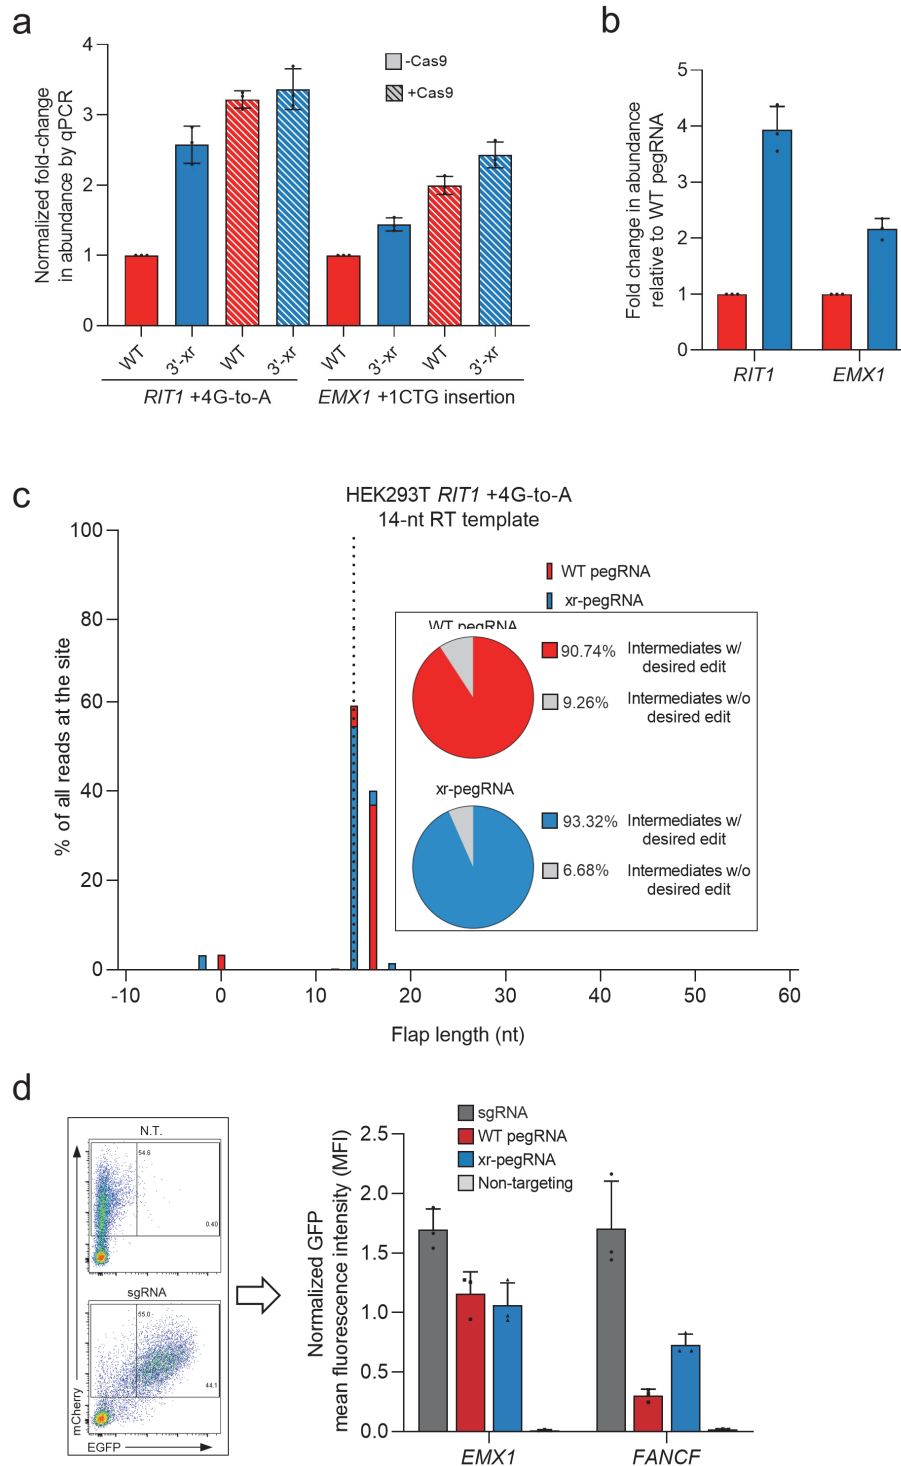

**Supplementary Fig. 19: The xrRNA motif increased pegRNA stability to preferentially impact its prime editing function.**

**a.** The *in vitro* transcribed WT pegRNAs or the corresponding xr-pegRNAs were first pre-incubated with (or without) a similar molar amount of Cas9 protein. The samples were then added with the HEK293T nuclear lysates. The levels of pegRNAs and xr-pegRNAs were determined by RT-

qPCR. Data presented are relative levels (mean  $\pm$  SD, n=3 biological replicates), with the remaining levels of WT pegRNAs (no Cas9) considered as 1.

- b.** The levels of two targeting pegRNAs and their corresponding xr-pegRNAs in transfected HEK293T cells were determined by RT-qPCR. The cells were also co-transfected with a PE2 plasmid. The presented levels of pegRNAs or xr-pegRNAs have been normalized to those of PE2. Data presented are relative levels (mean  $\pm$  SD, n=3 biological replicates), with levels of each WT pegRNA considered as 1.
- c.** Comparison of PE intermediates generated by PE2 with either WT pegRNAs or xr-pegRNAs at *RITI* site in HEK293T cells. The black dotted line represents the end of the full-length RT template (14 nt). In the histogram, the x axis corresponds to the sizes of the 3' flaps, with the first base downstream of the PE2-induced nick denoted as position +1, while the y axis represents the relative abundance of the reads (percentage of all reads). The inset (box) contains pie charts showing percentages of reads with (red/blue) or without (grey) intended edits. The data presented are calculated from an average of three independent biological replicates.
- d.** The abilities by two different groups of pegRNAs, xr-pegRNAs or sgRNAs (in combination with dCas9-VPR) to drive targeted activation of corresponding EGFP reporters were compared. On the left box, representative flow cytometry results shows an example of CRISPRa-dependent EGFP activation in transfected cells (mCherry). An sgRNA-mediated CRISPRa activity is shown in the example (corresponding to site in *EMXI* gene; N.T., a non-targeting pegRNA). On the right, the graph shows the MFI values for EGFP (normalized to those for mCherry), which indicate the levels of CRISPRa activities (mean  $\pm$  SD, n=3 biological replicates).

Source data are provided as a Source Data file.

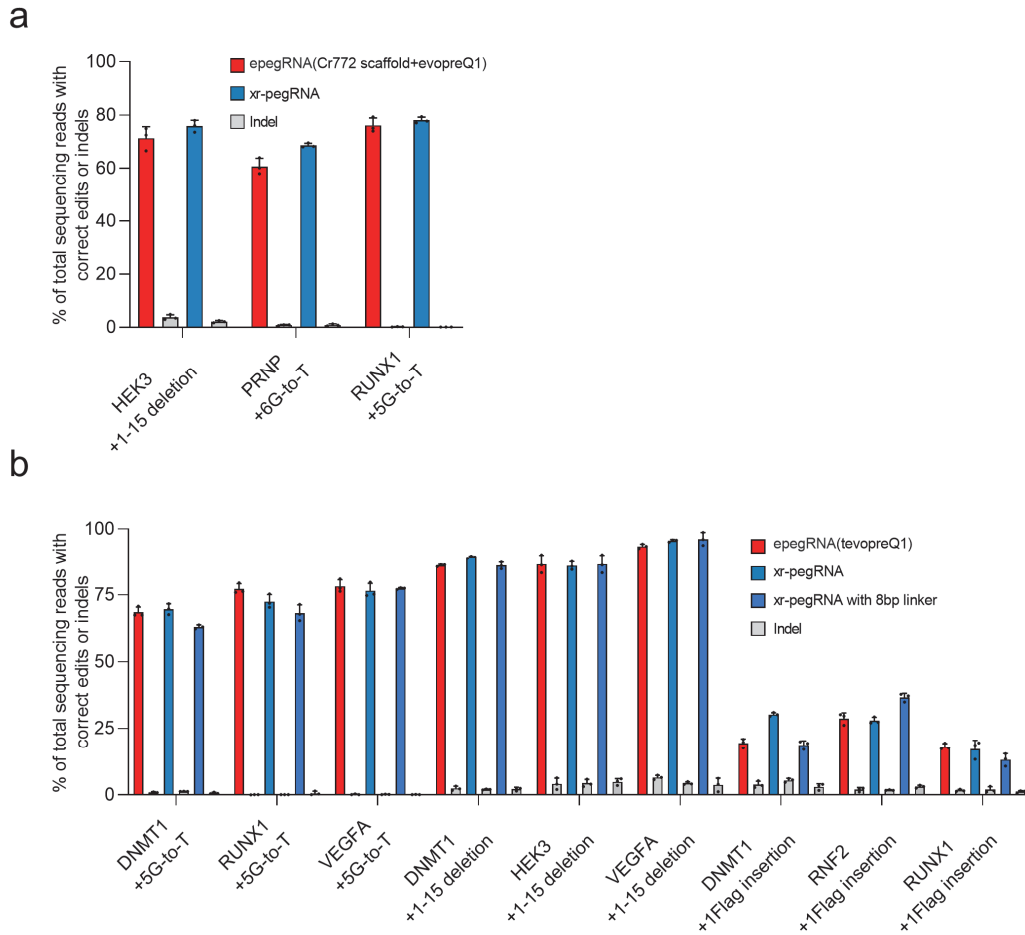

**Supplementary Fig. 20: Comparable editing efficiency by PE3 driven by xr-pegRNAs (with or without linkers) and epegRNAs in HEK293T cells.**

- a.** Comparison of prime editing by xr-pegRNA and the epegRNA (containing evopreQ1 motif and Cr772 scaffold) in HEK293T cells at 3 sites analyzed in the newly published epegRNA study. The editing efficiencies are shown by red/blue-colored bars (mean  $\pm$  SD, n=3 biological replicates).
- b.** Comparison of prime editing by xr-pegRNA, xr-pegRNA with 8-bp linkers and epegRNA (containing tevopreQ1 motif) in a PE3 context. The 9 edits attempted were in reference to the newly published epegRNA study. The editing efficiencies are shown by red/blue-colored bars (mean  $\pm$  SD, n=3 biological replicates).

In both **(a)** and **(b)**, the grey bars immediately next to the red/blue-colored bars indicate the indel frequencies associated with each editing group. Source data are provided as a Source Data file.

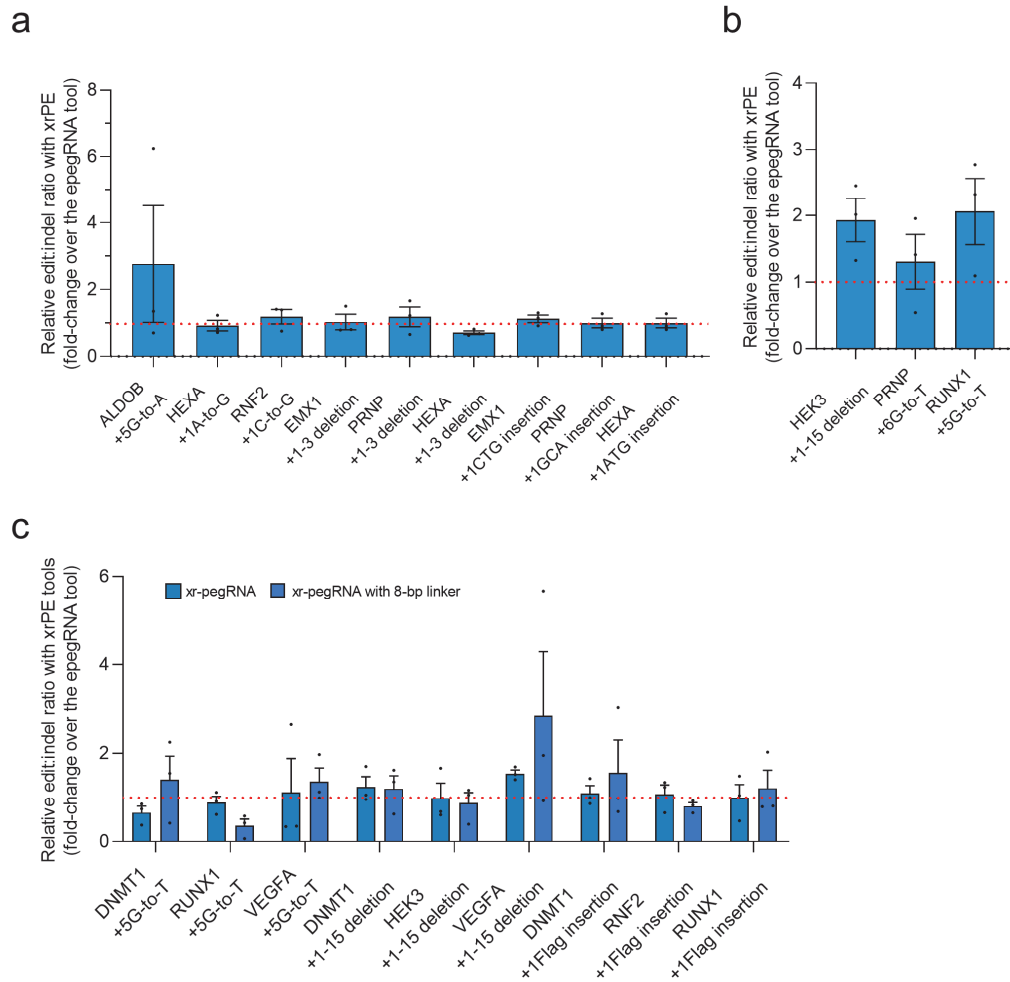

**Supplementary Fig. 21: Relative edit:indel ratios associated with prime editing experiments by xr-pegRNAs (with or without linkers) and epegRNAs shown in Fig. 5d and Supplementary Fig. 20.**

- a. Relative edit:indel ratios associated with xr-pegRNAs for 9 edits attempted earlier in our study are presented (mean  $\pm$  SEM, n = 3 biological replicates). The levels of the epegRNA group were set as 1 (the red dashed line). The results correspond to those in **Fig. 5d**.
- b. Relative edit:indel ratios associated with xr-pegRNAs for 3 edits initially attempted in the epegRNA study are presented (mean  $\pm$  SEM, n = 3 biological replicates). The levels of the epegRNA group were set as 1 (the red dashed line). The results correspond to those in **Supplementary Fig. 20a**.

c. Relative edit:indel ratios associated with xr-pegRNAs or their counterparts with 8-bp linkers are presented (mean  $\pm$  SEM, n = 3 biological replicates). The levels of the epegRNA group were set as 1 (the red dashed line). The results correspond to those in **Supplementary Fig. 20b**.

Source data are provided as a Source Data file.

Supplementary Table 1: Sequences for primers used for constructing WT pegRNA plasmids.

| NO.               | Forward primer                                                      |
|-------------------|---------------------------------------------------------------------|
| backbone pegRNA-F | AGCTAGGTCTCCTTTTTTAAAGAATTCTCGACCTCGAGAC                            |
| backbone pegRNA-R | TCTCTCGGTCTCACGGTGTTTCGT                                            |
| scaffold-top      | AGAGCTAGAAATAGCAAGTTAAAATAAGGCTAGTCCGTTATCAACTTGAAAAAGTGGCACCGAGTCG |
| scaffold-bottom   | GCACCGACTCGGTGCCACTTTTTCAAGTTGATAACGGACTAGCCTTATTTAACTTGCTATTTCTAG  |

**Supplementary Table 2: Primers used for HEK293T and Hela cells genomic DNA amplification and targeted deep sequencing.**

| NO.                                                                          | Forward primer               | Reverse primer        | Length of amplicon (nt) |
|------------------------------------------------------------------------------|------------------------------|-----------------------|-------------------------|
| Reporter                                                                     | NNNNNTGCCCGGCATCCACG         | CCTCGCCCTTGCTCAC      | 237                     |
| <i>ALDOB</i>                                                                 | NNNNNCTGAGTGAAGGTTTACTGG     | CTCCTACTAGAAGCACTGGAG | 238                     |
| <i>FAM171B</i>                                                               | NNNNNNGGTAATGAGGAGGCGTATGGGC | GGGCAAGGTCTGCGTAAAGT  | 213                     |
| <i>FBN1</i>                                                                  | NNNNNNTCGACCTCGAGGAGACAATG   | GGGCTGAGAGGACTGATCTTT | 252                     |
| <i>RIT1</i>                                                                  | NNNNNNGTATGGAAAGGTAAGGCACTG  | CCTACCACTCTTCCCTACACC | 237                     |
| <i>EMX1</i>                                                                  | NNNNNAGGTGAAGGTGTGGTTCCAG    | GCCAGCAGCAAGCAGCACTC  | 218                     |
| <i>FANCF</i>                                                                 | NNNNNCCTGCGCCACATCCATCGGC    | TGCACCAGGTGGTAACGAGC  | 219                     |
| <i>RNF2</i>                                                                  | NNNNNCCTCGCTCGCTCGCTCCTTC    | CAGCCCAGGGCTCCGCTGGC  | 208                     |
| <i>DNMT1</i>                                                                 | NNNNNNGCCTCACTGTGTGTGACAGC   | TGGAGAGCCCTAAATAGAGC  | 221                     |
| <i>PRNP</i>                                                                  | NNNNNNTGAGCAGCTGATACCATTGC   | GCGGTTGCCTCCAGGGCTGC  | 257                     |
| <i>HEXA</i>                                                                  | NNNNNNGAGAGCTCGCCCAACATCGC   | CCTGTTCTTGCCAGCAGGGC  | 260                     |
| <i>hAAVS1</i>                                                                | NNNNNNTAATGTGGCTCTGGTTCTGG   | CTGGCAAGGAGAGAGATGGC  | 209                     |
| <i>EGFR</i>                                                                  | NNNNNNTGCCACCGTCATCACCTTCC   | TGTGTTCTTTGGAGGTGGC   | 238                     |
| <i>PD1</i>                                                                   | NNNNNNAACCAGACGGACAAGCTGGC   | ACCTGTCACCCTGAGCTCTG  | 219                     |
| <i>CCR5</i>                                                                  | NNNNNNTACCTGGCTGTCGTCCATGC   | CCAGCCCCAAGATGACTATC  | 232                     |
| <i>CTLA4</i>                                                                 | NNNNNATGCATCTCCAGGCAAAGCC    | CTTGCAGATGTAGAGTCCCG  | 212                     |
|                                                                              |                              |                       |                         |
|                                                                              |                              |                       |                         |
| <b>Primers used to amplify Nelson et al-reported sites in HEK293T cells.</b> |                              |                       |                         |
| NO.                                                                          | Forward primer               | Reverse primer        |                         |
| <i>DNMT1</i>                                                                 | CACAACAGCTTCATGTCAGC         | GGTCCATGTCTGTTACTCGC  |                         |
| <i>HEK3</i>                                                                  | AGGGAAACGCCCATGCAAT          | CCTCCCTAGGTGCTGGCTT   |                         |
| <i>RUNX1</i>                                                                 | AAGAAAGAGAGATGTAGGGC         | CATTACAGGCAAAGCTGAGC  |                         |
| <i>VEGFA</i>                                                                 | ACTTGGTGCCAAATTCTTCTCC       | AAGAGGGAATGGGCTTTGGA  |                         |
| <i>RNF2</i>                                                                  | AGCCAACATACAGAAGTCAG         | TTTCCAGCAATGTCTCAGGC  |                         |
| <i>PRNP</i>                                                                  | CCACAGTCAGTGGAACAAGC         | CACAAAGTTGTTCTGGTTGC  |                         |

Supplementary Table 3: Primers used for N2a cells genomic DNA amplification and targeted deep sequencing

| NO.           | Forward primer       | Reverse primer        | Length of amplicon (nt) |
|---------------|----------------------|-----------------------|-------------------------|
| <i>Trp53</i>  | TCTACCCTTTCCTATAAGCC | GCGGGATGTATCTTAAGGGC  | 220                     |
| <i>Tnf</i>    | AAACCACCAAGTGGAGGAGC | AGAGGAGGTTGACTTTCTCC  | 227                     |
| <i>ROSA26</i> | AGGAGGCACTGTTAAGGAAC | ACCAAGGTACCTCAGGAGAG  | 237                     |
| <i>Tgfb1</i>  | ACGTCAGACATTCGGGAAGC | CTTAGGCTTCGACACTGTGC  | 234                     |
| <i>Il6</i>    | TGATGCTGGTGACAACCACG | AGCTTCAAATCCTAAGGGCC  | 265                     |
| <i>Ifng</i>   | AATTCAAATAGTGCTGGCAG | CCAACAACCTTGTATACTTGG | 213                     |
| <i>Ifnb1</i>  | CTCCATCAACTATAAGCAGC | AGTCTCATTCCACCCAGTGC  | 238                     |
| <i>Akt1</i>   | GATCTTATGTGCCTGGGTCC | TCTCAGTGGGCAGTTTCAGC  | 272                     |
| <i>Arg1</i>   | GGAGAAAGGACACAGGTTGC | CATAGGCACAGTACCTGAGC  | 225                     |



**Supplementary Table 4: Information of predicted off-target sites related to Supplementary Fig. 16.**

| NO.             | Chr.  | Off-target site          | Mis-matches |
|-----------------|-------|--------------------------|-------------|
| EMX1-peg-OT1    | chr1  | AtGGaTCaCATCACATCAACGGG  | 3           |
| EMX1-peg-OT2    | chr16 | AGGGgTCCCAGaACATCAACAGG  | 3           |
| EMX1-peg-OT3    | chr11 | AGaGCTCCCATCACAcCATtGG   | 3           |
| EMX1-peg-OT4    | chr18 | AGGGCTCCCAGgAgATCAACAGG  | 3           |
| EMX1-peg-OT5    | chr3  | AGaGCTtCCATCACATCAcTGG   | 3           |
| EMX1-peg-OT6    | chr8  | AtGtagCCCATCACATCAACAGG  | 4           |
| EMX1-peg-OT7    | chr8  | AtGtaaCCCATCACATCAACAGG  | 4           |
| EMX1-peg-OT8    | chr8  | AGGGCcCaCATCACtCAACTGG   | 4           |
| EMX1-nick-OT1   | chr8  | GAaATCaAgGTCCTCCCCATAGG  | 3           |
| EMX1-nick -OT2  | chr16 | GACATCGATagCCTCCCCAcTGG  | 3           |
| EMX1-nick -OT3  | chr16 | cACATaGgTGTCTCCCCATAGG   | 3           |
| EMX1-nick-OT4   | chr8  | GACATCGATGcaCcCCtCATGGG  | 4           |
| EMX1-nick-OT5   | chr8  | GACaggGAgGTCCTCCCaATGGG  | 4           |
| EMX1-nick-OT6   | chr8  | GACcTgGATGatCTCCCCATCGG  | 4           |
| EMX1-nick-OT7   | chr15 | aACTtCcATcTCCTCCCCATGGG  | 4           |
| EMX1-nick-OT8   | chr15 | GACcaCGATGTctTCCCCAgGGG  | 4           |
| FANCF-peg-OT1   | chr8  | GggAGAGGGctGCTTTGGGCAGG  | 3           |
| FANCF-peg-OT2   | chr8  | tCAAGAGGGCGGCTcgGGGCTGG  | 3           |
| FANCF-peg-OT3   | chr1  | GCAAGtGaGCGGCTgTGGCAGG   | 3           |
| FANCF-peg-OT4   | chr22 | GCAAGAGGctGGgTTTGGGCAGG  | 3           |
| FANCF-peg-OT5   | chr2  | GCAAGAGGGgGGCgTTGGGtCGG  | 3           |
| FANCF-peg-OT6   | chr17 | cCAAGAGGGCcGCTgTGGGCTGG  | 3           |
| FANCF-peg-OT7   | chr16 | GaAAGAGGGgGGCTgTGGGCGGG  | 3           |
| FANCF-peg-OT8   | chrX  | GCAAGAGGGtGGCtTtGGCTGG   | 3           |
| FANCF-nick-OT1  | chr8  | gCAGCAGGCaCAGAGAGAGCTGG  | 2           |
| FANCF-nick -OT2 | chr1  | CtGCAGGCcCAGAGAGAGCAGG   | 2           |
| FANCF-nick -OT3 | chr15 | CaAaCAGGaGCAGAGAGAGCTGG  | 3           |
| FANCF-nick-OT4  | chr15 | gCAGCAGGgGaAGAGAGAGCTGG  | 3           |
| FANCF-nick-OT5  | chr5  | CtGCAGGctCtGAGAGAGCAGG   | 3           |
| FANCF-nick-OT6  | chr5  | CCAGCAGGtGctGAGAGAAcCGG  | 3           |
| FANCF-nick-OT7  | chr5  | CggGCAGGCGCcGAGAGAGCGGG  | 3           |
| FANCF-nick-OT8  | chr20 | CCAGCAGcgGCAGAGAGAcCCGG  | 3           |
| HEXA-peg-OT1    | chr5  | GAACGaGTTCCcCTaGCATCTGG  | 3           |
| HEXA-peg-OT2    | chr20 | GAAaGgGTTCTACTGGCATCTGG  | 3           |
| HEXA-peg-OT3    | chr8  | tAACGTGTTCTACTGcaATCTGG  | 4           |
| HEXA-peg-OT4    | chr15 | GAgCcTGTTCCACTGaCATaAGG  | 4           |
| HEXA-peg-OT5    | chr5  | GAggGTGTgCtACTGGCATCTGG  | 4           |
| HEXA-peg-OT6    | chr5  | GAggGTGTgCtACTGGCATCTGG  | 4           |
| HEXA-peg-OT7    | chr5  | GAAtGtTaCCACaGGCATCAGG   | 4           |
| HEXA-peg-OT8    | chr5  | GAAGgGgGTgCtACTGGCATCTGG | 4           |
| HEXA-nick-OT1   | chr1  | AgACTTGGTCTaAGTGAACAGG   | 2           |
| HEXA-nick -OT2  | chr2  | AAACTTGGTgTGAGTGAAGCAGG  | 2           |
| HEXA-nick -OT3  | chr8  | AAACTTGGTCTctGTGAAaCGG   | 3           |
| HEXA-nick-OT4   | chr20 | AAACTTGGTCaGAGTGAgAtGGG  | 3           |
| HEXA-nick-OT5   | chr1  | AcACTTgCtCTGAGgGAAACCGG  | 3           |
| HEXA-nick-OT6   | chr1  | AAACTTGaTCTGATtCAACTGG   | 3           |
| HEXA-nick-OT7   | chr1  | AAACTTgTCTGAGTGgAAgAGG   | 3           |
| HEXA-nick-OT8   | chr17 | AAAaTTGGaCTGtGTGAAACAGG  | 3           |

**Supplementary Table 5: Primers used for off-target analysis related to Supplementary Fig. 16.**

| NO.             | Forward primer          | Reverse primer        | Length of amplicon |
|-----------------|-------------------------|-----------------------|--------------------|
| EMX1-peg-OT1    | TGGTCAGGTAGTTTGTACAC    | ATCATTCTCTGATAAGCAC   | 209                |
| EMX1-peg-OT2    | GGTGATGCCAGATCAGAGAC    | GTTGTACAGGAGGTAAGTGC  | 218                |
| EMX1-peg-OT3    | CATCCCTTCTCTCAACTC      | ACCTGTCTTAACTTCTAGC   | 241                |
| EMX1-peg-OT4    | GACGCCTAGGTGTCAGCATC    | TGTGCTGCTGCAGCTCCTGC  | 208                |
| EMX1-peg-OT5    | TAATCATACCTTGGGCCAAC    | TAAGCTTGGGCAGCAGTGAC  | 219                |
| EMX1-peg-OT6    | AGGATTGAGTCCGGGTATGC    | GCACATCATCTTTATCTGAT  | 207                |
| EMX1-peg-OT7    | TTATACCCTTGACCAACTGG    | AGGAAGTTCCTTTCTGTTCC  | 204                |
| EMX1-peg-OT8    | AAAGCCTGGGCTGTGTCAAC    | TGGTCTTGGTGTCCGTCAC   | 236                |
| EMX1-nick-OT1   | AGGCTGGTACACCCATCTCT    | TTGCCACGGAGTTGATCCCA  | 211                |
| EMX1-nick -OT2  | GGATTATCCAAGGTCACACAGC  | CCCCAGCACCTAGGTTACAG  | 251                |
| EMX1-nick -OT3  | TGTGGAGGCGTTGCAGAAGA    | CAGCAGGATGGAGTTTGTGG  | 199                |
| EMX1-nick-OT4   | CCATGTATGTGAAGGCCAAGG   | ATAAGTAAGCTTCTGCGGGC  | 229                |
| EMX1-nick-OT5   | GGATGAAAGTAGGCTAGTCC    | CTCTTCCAAGCTTCTGACC   | 250                |
| EMX1-nick-OT6   | CATGTGAAAGCTCAACCCAG    | GCCCAGTCTTGAGTGTGTCT  | 261                |
| EMX1-nick-OT7   | GCCCACACAGATGGCAGTAC    | CAGAGGAATACACCTCCCTG  | 224                |
| EMX1-nick-OT8   | CGTTCTGCACGTGTACCCCA    | GCCTTCAGTGTCCCAAACCT  | 229                |
| FANCF-peg-OT1   | TCATTCCACTTTCTGCTCGC    | CACTTCAACATCTTCACAGC  | 238                |
| FANCF-peg-OT2   | GGCTGGTGTAGTTACACAGC    | CTTCGGAGACCATGAGGAGC  | 193                |
| FANCF-peg-OT3   | ACCTCTGTACATCAGTTTGC    | CAGTTAGCCCTTATGTCACC  | 227                |
| FANCF-peg-OT4   | AAGCCATCAGTTGCAAGTGC    | AGTTTGGCCCTTCCCTGCCA  | 206                |
| FANCF-peg-OT5   | TGACTGGCTTGAGGTCTGCA    | ATCCCAGTGTGCTTAATGGC  | 261                |
| FANCF-peg-OT6   | CCCAGTTCTCAGTCCTAAGC    | TTGGGCCAGATTTAATGGGC  | 248                |
| FANCF-peg-OT7   | GAAGACTACATGGTGACACG    | AACACTGGGTCTGAGACACG  | 267                |
| FANCF-peg-OT8   | GATGATTAGACATGGTCTGC    | CTTTTGGTGACTIONCATACC | 209                |
| FANCF-nick-OT1  | CCAGGGATCCTCTGTTTCAG    | CCCAGTCTCTCAGGATGTA   | 248                |
| FANCF-nick -OT2 | CCTTGCAGCAGGGAACCTAAC   | AGCCAGGTGCTTCCCTCATAG | 225                |
| FANCF-nick -OT3 | TCTTTGGTGGCCCTGTGCTG    | TCCTGTCCTACCTCATGCTC  | 243                |
| FANCF-nick-OT4  | CTGGTGACTIONCAGGGATCCAG | TCCTGTCCTGCTTTGCGGTG  | 214                |
| FANCF-nick-OT5  | CTGTCTTCTCCACTTGTCTG    | AAGAGAGGCTCTGCAAGGGT  | 249                |
| FANCF-nick-OT6  | CTTCCCTACTTCTGACAGG     | GGCTGGAAACCTCGAAGCTCG | 217                |
| FANCF-nick-OT7  | GATCCTCGGACGCTTGAGGA    | GCGTCTGGGATGGTGTGGGA  | 268                |
| FANCF-nick-OT8  | AGCTGGGCATGGCTTCTCTAA   | GGCAAATACCAAGGAGGGT   | 258                |
| HEXA-peg-OT1    | TGGAGGGGGGATGGCATATC    | CCGGTTGATTATTTCCATGC  | 229                |
| HEXA-peg-OT2    | TATCTGTAGTCCCCTTCTGC    | AGATCAGGGTTCTTAATCTC  | 240                |
| HEXA-peg-OT3    | GAGAGGTGTGATGCAGTGAC    | CACTTCTGCTCTCATTCC    | 244                |
| HEXA-peg-OT4    | CCCAGATTACAGTCCAATCC    | GGCTGTGACTTTATCATCCG  | 247                |
| HEXA-peg-OT5    | TTCTTACCATCTGGTGGACA    | GTGCTTAAAATTCATCCTGC  | 203                |
| HEXA-peg-OT6    | CACCCACATTCTTCTTACC     | TCCTGCAGTAGTGTGACAGC  | 201                |
| HEXA-peg-OT7    | ACTTACTCCACTGGCTTGCC    | AGCAGTCCAAAGTGACTGAC  | 233                |
| HEXA-peg-OT8    | CCGGGTGATTTTCTCCAGC     | TTGGTCTTACCAGCAGGCC   | 221                |
| HEXA-nick-OT1   | GGAGACTAGGAAAGTCAGAG    | ACCTTGAGGAGGCAGGAGAA  | 269                |
| HEXA-nick -OT2  | CCGGTTCTTAGCTCTGCTGT    | CCTGTGTTACCCCATGATGC  | 249                |
| HEXA-nick -OT3  | AATTAATGGGAGAGGGAGC     | GGTATAGGCCATCGGAGTCT  | 242                |
| HEXA-nick-OT4   | GTTCCAGATGCCACTCTGC     | GTGGTCAGAGTAGCCAAGGC  | 247                |
| HEXA-nick-OT5   | GGCACTGTGGCTTCTGTTC     | CTTCCAAGCTCACCCACGTG  | 234                |
| HEXA-nick-OT6   | GTACCTGAGCTTAGGAGGGA    | TTCCCTCAGAGACACATGT   | 252                |
| HEXA-nick-OT7   | CCAAGATATGGGCTAGCGTG    | ATGTTCACTCCTGACATGGC  | 220                |
| HEXA-nick-OT8   | GGCTGGTTTGACGCAAACAG    | GGGAGTCATCTGGTGCATC   | 228                |

Supplementary Table 6: Primers used for pegRNA RT-qPCR analysis.

| NO.       | Forward primer       | Reverse primer        |
|-----------|----------------------|-----------------------|
| qPCR-RIT1 | TGCTACAGCAGCTACCAACT | CGACTCGGTGCCACTTTTTTC |
| qPCR-EMX1 | AGGGCTCCCATCACATCAAC | CGACTCGGTGCCACTTTTTTC |
| qPCR-Cas9 | CTCTGTGGGCTGGGCC     | TGCTGTGCCGGTCGG       |
