# Supplementary material for: Enhancement of prime editing via xrRNA motif-joined pegRNA
Source: PubMed Central journal article supplement (PMC8986804; doi:10.1038/s41467-022-29507-x), 2022-04-06
Supplement: 41467_2022_29507_MOESM3_ESM.pdf [file 41467_2022_29507_MOESM3_ESM.pdf]

## Reporting Summary

Nature Portfolio wishes to improve the reproducibility of the work that we publish. This form provides structure for consistency and transparency in reporting. For further information on Nature Portfolio policies, see our [Editorial Policies](#) and the [Editorial Policy Checklist](#).

### Statistics

For all statistical analyses, confirm that the following items are present in the figure legend, table legend, main text, or Methods section.

n/a Confirmed

- |                                     |                                     |                                                                                                                                                                                                                                                            |
|-------------------------------------|-------------------------------------|------------------------------------------------------------------------------------------------------------------------------------------------------------------------------------------------------------------------------------------------------------|
| <input type="checkbox"/>            | <input checked="" type="checkbox"/> | The exact sample size ( $n$ ) for each experimental group/condition, given as a discrete number and unit of measurement                                                                                                                                    |
| <input type="checkbox"/>            | <input checked="" type="checkbox"/> | A statement on whether measurements were taken from distinct samples or whether the same sample was measured repeatedly                                                                                                                                    |
| <input type="checkbox"/>            | <input checked="" type="checkbox"/> | The statistical test(s) used AND whether they are one- or two-sided<br><i>Only common tests should be described solely by name; describe more complex techniques in the Methods section.</i>                                                               |
| <input checked="" type="checkbox"/> | <input type="checkbox"/>            | A description of all covariates tested                                                                                                                                                                                                                     |
| <input checked="" type="checkbox"/> | <input type="checkbox"/>            | A description of any assumptions or corrections, such as tests of normality and adjustment for multiple comparisons                                                                                                                                        |
| <input type="checkbox"/>            | <input checked="" type="checkbox"/> | A full description of the statistical parameters including central tendency (e.g. means) or other basic estimates (e.g. regression coefficient) AND variation (e.g. standard deviation) or associated estimates of uncertainty (e.g. confidence intervals) |
| <input type="checkbox"/>            | <input checked="" type="checkbox"/> | For null hypothesis testing, the test statistic (e.g. $F$ , $t$ , $r$ ) with confidence intervals, effect sizes, degrees of freedom and $P$ value noted<br><i>Give <math>P</math> values as exact values whenever suitable.</i>                            |
| <input checked="" type="checkbox"/> | <input type="checkbox"/>            | For Bayesian analysis, information on the choice of priors and Markov chain Monte Carlo settings                                                                                                                                                           |
| <input checked="" type="checkbox"/> | <input type="checkbox"/>            | For hierarchical and complex designs, identification of the appropriate level for tests and full reporting of outcomes                                                                                                                                     |
| <input checked="" type="checkbox"/> | <input type="checkbox"/>            | Estimates of effect sizes (e.g. Cohen's $d$ , Pearson's $r$ ), indicating how they were calculated                                                                                                                                                         |

*Our web collection on [statistics for biologists](#) contains articles on many of the points above.*

### Software and code

Policy information about [availability of computer code](#)

Data collection

Data analysis

For manuscripts utilizing custom algorithms or software that are central to the research but not yet described in published literature, software must be made available to editors and reviewers. We strongly encourage code deposition in a community repository (e.g. GitHub). See the Nature Portfolio [guidelines for submitting code & software](#) for further information.

### Data

Policy information about [availability of data](#)

All manuscripts must include a [data availability statement](#). This statement should provide the following information, where applicable:

- Accession codes, unique identifiers, or web links for publicly available datasets
- A description of any restrictions on data availability
- For clinical datasets or third party data, please ensure that the statement adheres to our [policy](#)

## Field-specific reporting

Please select the one below that is the best fit for your research. If you are not sure, read the appropriate sections before making your selection.

Life sciences  Behavioural & social sciences  Ecological, evolutionary & environmental sciences

For a reference copy of the document with all sections, see [nature.com/documents/nr-reporting-summary-flat.pdf](https://www.nature.com/documents/nr-reporting-summary-flat.pdf)

## Life sciences study design

All studies must disclose on these points even when the disclosure is negative.

|                 |                                                                                                                                                                                                                                                                                                                                                                                                                                                                        |
|-----------------|------------------------------------------------------------------------------------------------------------------------------------------------------------------------------------------------------------------------------------------------------------------------------------------------------------------------------------------------------------------------------------------------------------------------------------------------------------------------|
| Sample size     | Samples sizes were indicated in figure legends. We did not predetermine sample sizes. The sample sizes for our experiments were based on related studies in the field (see Refs: Anzalone A, Randolph P, Davis J et al., 2019 [10.1038/s41586-019-1711-4]; Liu P, Liang S, Zheng C et al., 2021 [10.1038/s41467-021-22295-w]; Lin Q, Jin S, Zong Y et al., 2021 [10.1038/s41587-021-00868-w]; Nelson J, Randolph P, Shen S et al., 2021 [10.1038/s41587-021-01039-7]). |
| Data exclusions | No data has been excluded from the analyses.                                                                                                                                                                                                                                                                                                                                                                                                                           |
| Replication     | As indicated in the figure legends, all data represented have been validated in biological replicates and through independent experiments. The average values from such replications are presented (+/- STD, or +/- SEM, as indicated in the legend). The reported results are highly reproducible.                                                                                                                                                                    |
| Randomization   | No randomization of samples was applied. In any given experiment within this study, both the control groups and experimental groups (cells) were prepared at the same time. They were further handled under identical conditions, except for the designed experimental variables (introduction of specific plasmids).                                                                                                                                                  |
| Blinding        | Blinding was not applied. For most of the experiments, a series of samples representing different groups are analyzed side-by-side in a single trial. All measurements in this study are highly objective (fluorescent readings, deep sequencing, etc). Moreover, experimental replications are performed to exclude artifacts.                                                                                                                                        |

## Reporting for specific materials, systems and methods

We require information from authors about some types of materials, experimental systems and methods used in many studies. Here, indicate whether each material, system or method listed is relevant to your study. If you are not sure if a list item applies to your research, read the appropriate section before selecting a response.

### Materials & experimental systems

| n/a                                 | Involved in the study                                     |
|-------------------------------------|-----------------------------------------------------------|
| <input type="checkbox"/>            | <input checked="" type="checkbox"/> Antibodies            |
| <input type="checkbox"/>            | <input checked="" type="checkbox"/> Eukaryotic cell lines |
| <input checked="" type="checkbox"/> | <input type="checkbox"/> Palaeontology and archaeology    |
| <input checked="" type="checkbox"/> | <input type="checkbox"/> Animals and other organisms      |
| <input checked="" type="checkbox"/> | <input type="checkbox"/> Human research participants      |
| <input checked="" type="checkbox"/> | <input type="checkbox"/> Clinical data                    |
| <input checked="" type="checkbox"/> | <input type="checkbox"/> Dual use research of concern     |

### Methods

| n/a                                 | Involved in the study                              |
|-------------------------------------|----------------------------------------------------|
| <input checked="" type="checkbox"/> | <input type="checkbox"/> ChIP-seq                  |
| <input type="checkbox"/>            | <input checked="" type="checkbox"/> Flow cytometry |
| <input checked="" type="checkbox"/> | <input type="checkbox"/> MRI-based neuroimaging    |

## Antibodies

|                 |                                                                                                                                                                                                                                                                                                                                                                                                                                                                                                                                                                                                                                                                                                                                                                                                                                                                                                                                                                                                                                                                 |
|-----------------|-----------------------------------------------------------------------------------------------------------------------------------------------------------------------------------------------------------------------------------------------------------------------------------------------------------------------------------------------------------------------------------------------------------------------------------------------------------------------------------------------------------------------------------------------------------------------------------------------------------------------------------------------------------------------------------------------------------------------------------------------------------------------------------------------------------------------------------------------------------------------------------------------------------------------------------------------------------------------------------------------------------------------------------------------------------------|
| Antibodies used | anti-Cas9 (Genscript (A01935, clone 4A1), 1:500), anti-GAPDH (Santa cruz (sc47724, clone 0411), 1:1000) and anti-GFP (ABclonal (AE012), 1:2000)                                                                                                                                                                                                                                                                                                                                                                                                                                                                                                                                                                                                                                                                                                                                                                                                                                                                                                                 |
| Validation      | The anti-Cas9 antibody has been characterized by the vendor ( <a href="https://www.genscript.com.cn/antibody/A01935_40-GenCRISPR_SpCas9_Antibody_4A1_mAb_Mouse.html">https://www.genscript.com.cn/antibody/A01935_40-GenCRISPR_SpCas9_Antibody_4A1_mAb_Mouse.html</a> ) for WB, IF and ELISA. Our results in Fig. 1 included negative controls of untransfected cells and the bands exhibited the correct size.<br>The anti-GAPDH antibody is validated by the vendors ( <a href="https://www.scbt.com/p/gapdh-antibody-0411/">https://www.scbt.com/p/gapdh-antibody-0411/</a> ) for WB, IP, IF and IHC(P). It has also been validated in our previous study (Tong Y. et al., EBioMedicine 2019 ).<br>The anti-GFP antibody has been characterized by the vendor ( <a href="https://abclonal.com.cn/catalog/AE012">https://abclonal.com.cn/catalog/AE012</a> ) for IB and IF. No clone number for this mouse antibody is provided by the vendor. Our results in Fig. 1 included negative controls and the bands exhibited the correct size (mRuby-EGFP fusion). |

## Eukaryotic cell lines

Policy information about [cell lines](#)

|                                                                   |                                                                                                   |
|-------------------------------------------------------------------|---------------------------------------------------------------------------------------------------|
| Cell line source(s)                                               | HEK293T (ATCC CRL-3216), HeLa (ATCC CCL-2), and Neuro-2a (N2a, ATCC HTB-96) cells                 |
| Authentication                                                    | HEK293T was not authenticated. Other cell lines were authenticated by the supplier by STR typing. |
| Mycoplasma contamination                                          | All cell lines were tested negative of mycoplasma contaminations.                                 |
| Commonly misidentified lines (See <a href="#">ICLAC</a> register) | None of the cell lines used are listed in the ICLAC database.                                     |

## Flow Cytometry

### Plots

Confirm that:

- The axis labels state the marker and fluorochrome used (e.g. CD4-FITC).
- The axis scales are clearly visible. Include numbers along axes only for bottom left plot of group (a 'group' is an analysis of identical markers).
- All plots are contour plots with outliers or pseudocolor plots.
- A numerical value for number of cells or percentage (with statistics) is provided.

### Methodology

|                           |                                                                                                                                                                                                                                                                                                                                                                                                                                                                                                                                                                                                                                                                                                            |
|---------------------------|------------------------------------------------------------------------------------------------------------------------------------------------------------------------------------------------------------------------------------------------------------------------------------------------------------------------------------------------------------------------------------------------------------------------------------------------------------------------------------------------------------------------------------------------------------------------------------------------------------------------------------------------------------------------------------------------------------|
| Sample preparation        | The transfected cells were trypsinized for preparation of single-cell suspensions. After washing, the cells were subjected to flow cytometry analyses.                                                                                                                                                                                                                                                                                                                                                                                                                                                                                                                                                     |
| Instrument                | BD LSRFortessa for analysis, BD AriaIII for sorting                                                                                                                                                                                                                                                                                                                                                                                                                                                                                                                                                                                                                                                        |
| Software                  | FACSDiva (8.0.1) for collections, and FlowJo (X 10.07r2) for analyses                                                                                                                                                                                                                                                                                                                                                                                                                                                                                                                                                                                                                                      |
| Cell population abundance | For analyses of EGFP reporter, a total of around 10,000 cells were analyzed.                                                                                                                                                                                                                                                                                                                                                                                                                                                                                                                                                                                                                               |
| Gating strategy           | For PE analyses, cells were co-transfected with an EGFP plasmid. The predominant cell populations in the FSC/SSC plot were first selected. EGFP+ cells were gated and subsequently sorted for genomic DNA preparation (see Supplementary Fig. 4a for gating strategy). In cells transfected with the reporter for prime editing, the non-targeting pegRNA group was used as the negative control to gate for the EGFP+ cells in the Ruby+ population (see Supplementary Fig. 3b, the negative and positive controls in the red boxes). In cells transfected with CRISPRa reagents and a EGFP reporter, mCherry (from a co-transfected plasmid) was used as transfection controls (Supplementary Fig. 14d). |

- Tick this box to confirm that a figure exemplifying the gating strategy is provided in the Supplementary Information.
